# Supplementary material for: Seasonal fluctuations of litter and soil Collembola and their drivers in rainforest and plantation systems
Source: PeerJ. 2024 Apr 1;12:e17125. doi: 10.7717/peerj.17125 (PMC10993886; doi:10.7717/peerj.17125)
Supplement: Supplemental Information 3 [file peerj-12-17125-s003.xlsx]

## Sheet: abundance m2
								Litter
Season	System	Layer	abundance	abundace m2				Season	Rainforest	Rubber	Oil Palm
March	Oil palm	litter	3359.16	839.79		839.79		March	9393.93	2348.48	840
June	Oil palm	litter	12030.5	3007.62		3007.62		June	6376.55	1594.14	3008
August	Oil palm	litter	546.84	136.71		136.71		August	8681.09	2170.27	137
November	Oil palm	litter	11327.4	2831.85		2831.85		November	9188.86	2297.22	2832
March	Rainforest	litter	37575.7	9393.93		9393.93		sample size	4	4	4
June	Rainforest	litter	25506.2	6376.55		6376.55		average	8410.11	2102.53	1704.25
August	Rainforest	litter	34724.3	8681.09		8681.09		standar deviation	1388.43	347.106	1434.66
November	Rainforest	litter	36755.5	9188.86		9188.86		alpha	0.05	0.05	0.05
March	Rubber	litter	4921.56	1230.39		1230.39		confidence interval	2209.29	552.324	2282.87
June	Rubber	litter	10350.9	2587.73		2587.73
August	Rubber	litter	16327.1	4081.77		4081.77
November	Rubber	litter	19061.3	4765.32		4765.32
March	Oil palm	soil	8827.56	2206.89		2206.89
June	Oil palm	soil	7265.16	1816.29		1816.29
August	Oil palm	soil	13124.2	3281.04		3281.04
November	Oil palm	soil	6366.78	1591.7		1591.7
March	Rainforest	soil	10975.9	2743.97		2743.97
June	Rainforest	soil	12421.1	3105.27		3105.27
August	Rainforest	soil	27967	6991.74		6991.74
November	Rainforest	soil	9100.98	2275.25		2275.25
March	Rubber	soil	11054	2763.5		2763.5
June	Rubber	soil	18319.1	4579.78		4579.78
August	Rubber	soil	24295.3	6073.83		6073.83
November	Rubber	soil	10507.1	2626.79		2626.79		Soil
								Season	Rainforest	Rubber	Oil Palm
								March	2743.97	2763.5	2206.89
								June	3105.27	4579.78	1816.29
								August	6991.74	6073.83	3281.04
								November	2275.25	2626.79	1591.7
								Average	3779.06	4010.97	2223.98
								stdev	2168.58	1638.2	749.147
								sample size	4	4	4
								alpha	0.05	0.05	0.05
								confidence interval	3450.69	2606.74	1192.06
									+

## Sheet: abundance soil+litter
Season	System	Density
March	Oil palm	3047
June	Oil palm	4824
August	Oil palm	3418
November	Oil palm	4424
March	Rainforest	12138
June	Rainforest	9482
August	Rainforest	15673
November	Rainforest	11464
March	Rubber	5111
June	Rubber	6174
August	Rubber	8244
November	Rubber	4924
Season	Rainforest	Rubber	Oil Palm
March	12138	5111	3047														7
June	9482	6174	4824
August	15673	8244	3418
November	11464	4924	4424
sample size	4	4	4
mean	12189.2	6113.25	3928.25
Stdev	2581.62	1523.44	833.685
alpha	0.05	0.05	0.05
confidence inrerval	4107.94	2424.13	1326.58
