# Supplementary material for: Seasonal fluctuations of litter and soil Collembola and their drivers in rainforest and plantation systems
Source: PeerJ. 2024 Apr 1;12:e17125. doi: 10.7717/peerj.17125 (PMC10993886; doi:10.7717/peerj.17125)
Supplement: Supplemental Information 5 [file peerj-12-17125-s005.xlsx]

## Sheet: Raw data
Date	Tmean	Tmax	Tmin	Precipitation
1991-01-01	26.95	31.8	23.4	0
1991-01-02	26.25	31.2	23.6	0
1991-01-03	26.15	30.2	23.4	7
1991-01-04	27.25	31.2	24	0
1991-01-05	25.325	28.4	23.4	7
1991-01-06	27	31.2	23.5	0
1991-01-07	27.2	31.4	23.8	0
1991-01-08	27.35	32	23.1	0
1991-01-09	26.95	29.6	23	0
1991-01-10	26.125	30.1	23.9	2
1991-01-11	26.075	29.9	23.8	0
1991-01-12	26.85	31.6	23.6	2
1991-01-13	27.1	32.2	22.8	0
1991-01-14	25.8	29.8	23.8	5
1991-01-15	25.575	28.5	23.4	1
1991-01-16	26.3	30.3	23.3	18
1991-01-17	24.525	26.4	23.4	24
1991-01-18	25.65	28.8	23.2	11
1991-01-19	26.4	32.2	23	0
1991-01-20	25.55	30	23.3	3
1991-01-21	25.75	31.14	23.4	2
1991-01-22	25.85	29.4	23.8	2
1991-01-23	25.875	29.8	23.8	0
1991-01-24	26.65	31	23.2	0
1991-01-25	26.1	31.8	22.6	2
1991-01-26	26.75	32	24.1	6
1991-01-27	26.55	32.3	23.2	5
1991-01-28	25.925	31	23.3	15
1991-01-29	25.15	30	22.8	1
1991-01-30	25.55	30.4	22.8	6
1991-01-31	26.5	30	23.8	0
1991-02-01	25.25	31.2	23.6	5
1991-02-02	26.275	30.3	23.4	0
1991-02-03	26.85	31	23.5	10
1991-02-04	26.35	31.6	23	0
1991-02-05	26.45	31.4	23.2	19
1991-02-06	25.9	30	23	7
1991-02-07	25.45	30	22.8	0
1991-02-08	25.4	30.3	22.6	0
1991-02-09	26.775	31	22.8	0
1991-02-10	27.1	31	22.8	0
1991-02-11	27.1	32	23	11
1991-02-12	26.05	32	21.7	0
1991-02-13	27.15	32	23.8	0
1991-02-14	26.35	31.8	22.8	0
1991-02-15	27.525	33.6	22.9	2
1991-02-16	27.15	32.6	23	0
1991-02-17	27.3	32.8	23.6	4
1991-02-18	25	31	22.2	2
1991-02-19	26.35	31.4	22.2	0
1991-02-20	26.85	32.4	22.2	0
1991-02-21	26.3	31.2	21.5	0
1991-02-22	26.35	31.2	24.2	2
1991-02-23	27.2	30.6	23.6	0
1991-02-24	27.05	30.8	24.2	0
1991-02-25	27.375	31.3	24.2	0
1991-02-26	27.2	32.2	23.8	0
1991-02-27	27.85	33.1	23.9	0
1991-02-28	24.675	29.6	24.8	3
1991-03-01	26.85	32.6	22.4	0
1991-03-02	25.7	32.4	24.4	18
1991-03-03	26.975	32.3	23.7	0
1991-03-04	26.875	33.1	21.8	0
1991-03-05	27.275	32.8	22.5	0
1991-03-06	25.75	29.1	22.4	4
1991-03-07	26.55	30.8	24.6	14
1991-03-08	27.6	32.2	23.4	0
1991-03-09	26.05	32	23.3	0
1991-03-10	25.775	31.4	23.2	0
1991-03-11	25.725	31.4	23.3	19
1991-03-12	26.925	31.4	23	28
1991-03-13	26.15	31.2	22	0
1991-03-14	26.8	31.4	24.2	9
1991-03-15	25.925	30.74	22.8	7
1991-03-16	26.875	31.7	22.8	5
1991-03-17	26.15	30	23.5	2
1991-03-18	26.575	30.2	23.8	3
1991-03-19	27.1	32.4	23.4	51
1991-03-20	25	27.6	22.7	1
1991-03-21	26.6	33	24.3	1
1991-03-22	26.125	32.7	22.2	39
1991-03-23	25.4	31.4	21.2	38
1991-03-24	26.5225	31.4	22.4	23
1991-03-25	27.65	32.4	23.2	0
1991-03-26	26.5	32.2	23.4	12
1991-03-27	25.75	30.4	23.4	0
1991-03-28	26.725	32	23.4	0
1991-03-29	25.25	33	23.5	74
1991-03-30	24.425	30.4	23	0
1991-03-31	27.2	33	23	18
1991-04-01	26.15	31.8	22.4	0
1991-04-02	27.15	31.2	23.6	0
1991-04-03	26.925	31.4	23.8	0
1991-04-04	27.075	33.4	23.9	0
1991-04-05	27.4	33	24	89
1991-04-06	25.95	33	22	9
1991-04-07	27.35	33	24	25
1991-04-08	27.55	33.9	22.3	34
1991-04-09	26.9	32.4	23.4	0
1991-04-10	26.675	30.6	23.9	0
1991-04-11	27.2	30.8	23	0
1991-04-12	27.95	33.6	23	0
1991-04-13	27.5	31.8	24.3	8
1991-04-14	27.125	31.3	24	0
1991-04-15	26.7	31.6	23.6	16
1991-04-16	26.1	31.4	23.4	5
1991-04-17	27.325	32.4	23.4	2
1991-04-18	27.35	31	23.4	14
1991-04-19	27.5	33	24.2	0
1991-04-20	26.8	33	23.6	0
1991-04-21	26.925	32	24.6	23
1991-04-22	25.8	30.4	22.4	0
1991-04-23	27.9	33.8	22.2	0
1991-04-24	28.45	33.6	24.4	23
1991-04-25	25.85	30.4	22.8	0
1991-04-26	27.4	33.4	24.4	0
1991-04-27	26.65	30.6	24.2	0
1991-04-28	27.4	33.6	24	0
1991-04-29	26.2	31.8	24.2	4
1991-04-30	26.4	32.8	23.4	0
1991-05-01	26.95	32.8	23.3	0
1991-05-02	28.125	32.6	24.8	0
1991-05-03	27.1	32.1	24.8	0
1991-05-04	27.1	32	24.4	1
1991-05-05	26.175	30	23.2	0
1991-05-06	25.8	31.2	23.2	2
1991-05-07	25.8	31.2	23.1	17
1991-05-08	26.775	31.8	22.9	0
1991-05-09	25.7	31.4	23.4	4
1991-05-10	25.25	30.4	23.4	0
1991-05-11	26.5	29.6	23.4	5
1991-05-12	27.95	31.8	23.6	0
1991-05-13	26.7	31	24.3	3
1991-05-14	26.925	32.2	23.6	0
1991-05-15	27.05	32.6	24.6	1
1991-05-16	27.3	32.4	24.4	9
1991-05-17	26.675	32.2	24.4	3
1991-05-18	26.525	30.8	24.2	2
1991-05-19	26.05	31.2	23.7	2
1991-05-20	25.925	30	23.6	0
1991-05-21	24.9	30.3	24	15
1991-05-22	26.475	31.4	23.4	0
1991-05-23	28.025	33.2	23.2	0
1991-05-24	27.05	33	24	0
1991-05-25	27	31.8	23.3	0
1991-05-26	27.4	32.1	23.7	0
1991-05-27	26.85	32.6	23.6	10
1991-05-28	25.85	29.7	24	45
1991-05-29	26.3	30.6	23.2	0
1991-05-30	26.8	31	23.4	6
1991-05-31	27.45	32.2	24	6
1991-06-01	27.575	32	24.3	6
1991-06-02	25.625	27.6	25	9
1991-06-03	25.825	31.4	23.2	0
1991-06-04	25.55	29.2	24.2	5
1991-06-05	27.25	31.4	23.4	0
1991-06-06	27.85	32.2	24.2	0
1991-06-07	27.075	32	23.7	0
1991-06-08	26.025	32.6	22	0
1991-06-09	27.675	32.4	22.8	0
1991-06-10	28.075	33	23.2	0
1991-06-11	27.75	33.4	24.2	0
1991-06-12	28.1	33.4	23.8	0
1991-06-13	28.5	33.4	23.8	0
1991-06-14	27.975	33.7	24.6	0
1991-06-15	28.625	33.7	24.4	0
1991-06-16	28.45	33.4	24.2	0
1991-06-17	27.85	33	24.2	0
1991-06-18	28.2	32.8	24	0
1991-06-19	27.85	33	23.6	0
1991-06-20	26.925	31.8	22.7	0
1991-06-21	28.075	33	23.6	0
1991-06-22	26.85	32.6	22.8	0
1991-06-23	27.45	32.8	23.8	0
1991-06-24	26.8	33	22.5	0
1991-06-25	27.45	32.7	23.8	0
1991-06-26	27.525	32.4	24.2	0
1991-06-27	27.65	32.6	23.4	0
1991-06-28	27.15	31.6	23	0
1991-06-29	27.075	32.6	23	0
1991-06-30	26.75	32.2	23.2	0
1991-07-01	26.725	32.5	22.3	0
1991-07-02	26.9	32.2	22.4	0
1991-07-03	26.75	32.2	22.2	0
1991-07-04	25.8	32.1	21	0
1991-07-05	27.025	33	21.4	0
1991-07-06	26.55	33	21.6	0
1991-07-07	27.175	32.9	21.8	0
1991-07-08	25.725	28.7	23.6	0
1991-07-09	27.1	32	23	0
1991-07-10	26.25	30.6	22.6	0
1991-07-11	27	33.4	21.4	0
1991-07-12	27.05	32.8	21.8	0
1991-07-13	26.875	32.6	22.1	0
1991-07-14	26.625	32.4	22.2	0
1991-07-15	27.35	32.8	22.9	0
1991-07-16	28.075	34	22.8	0
1991-07-17	27.25	33.2	22.8	0
1991-07-18	26.85	32	22.6	0
1991-07-19	28	34.4	22	0
1991-07-20	26.6	30.6	22.8	0
1991-07-21	26.6	32	22.6	0
1991-07-22	26.95	31.7	22.6	0
1991-07-23	25.7	31.2	22.7	8
1991-07-24	27.45	32.2	22.8	0
1991-07-25	28.175	33.3	23.7	0
1991-07-26	26.975	32.47	23.8	0
1991-07-27	26.775	31.3	24	0
1991-07-28	27.075	31.4	22.8	0
1991-07-29	28.1	33.4	22.8	0
1991-07-30	27.225	32	24	0
1991-07-31	27.2	33.3	21.8	0
1991-08-01	27.525	33.2	21.8	0
1991-08-02	27.975	33.9	24.1	0
1991-08-03	27.45	33.1	23.4	0
1991-08-04	26.95	33.2	21	0
1991-08-05	26.05	32	21.6	0
1991-08-06	25.625	31.4	25.6	0
1991-08-07	26.55	31.8	22.2	0
1991-08-08	26.45	32.6	22.5	0
1991-08-09	27.1	33.6	22.4	0
1991-08-10	26.75	33.2	21.6	0
1991-08-11	26.3	33	22.6	0
1991-08-12	27.275	33.2	22.5	0
1991-08-13	26.975	32.5	23.2	0
1991-08-14	28.1	33.4	22.8	0
1991-08-15	27.5	33.2	23.4	0
1991-08-16	27.1	31.4	23.4	0
1991-08-17	27.1	32.4	23.8	0
1991-08-18	27.25	33.4	22.6	0
1991-08-19	26.675	32.1	21.9	0
1991-08-20	27.025	32.9	22.5	0
1991-08-21	26.225	30.6	22	0
1991-08-22	27.4	33.2	23.2	0
1991-08-23	27.2	31.4	24	0
1991-08-24	27.525	31.2	23.6	0
1991-08-25	27.675	32.6	24	0
1991-08-26	27.7	32.1	23.8	61
1991-08-27	25.8	31.4	22.8	62
1991-08-28	27.25	33.2	22.6	0
1991-08-29	27.85	33	24.5	0
1991-08-30	27.5	33	24.3	0
1991-08-31	27.6	31.2	24	0
1991-09-01	26.475	29.6	22.3	4
1991-09-02	26.6	31	22.6	0
1991-09-03	27.7	33	22.8	0
1991-09-04	26.55	33	22.6	1
1991-09-05	27.7	33.4	23.3	0
1991-09-06	26.85	32.8	22.2	0
1991-09-07	27.225	33	21.8	0
1991-09-08	27.6	32.2	21.8	0
1991-09-09	27.5	32.2	21.6	0
1991-09-10	27.3	32.4	22.6	0
1991-09-11	27.4	32.4	22.3	0
1991-09-12	26.45	31.5	22.8	0
1991-09-13	26.65	32.4	23.4	0
1991-09-14	27.75	32.1	23.2	0
1991-09-15	27.9	32	23.2	0
1991-09-16	27.3	29.8	22.8	0
1991-09-17	27.25	30.6	24.3	0
1991-09-18	27.025	31.4	23.3	0
1991-09-19	26.925	29.8	23.2	0
1991-09-20	27.15	32.1	23.4	0
1991-09-21	27.4	32.6	23.2	0
1991-09-22	26.5	29.6	23.8	0
1991-09-23	26.9	32.4	22.3	0
1991-09-24	27.15	31.8	23.4	0
1991-09-25	27.175	32.5	24.2	0
1991-09-26	27.4	32.6	23.2	0
1991-09-27	27.45	33.2	23.4	0
1991-09-28	27.9	32.4	23.2	0
1991-09-29	26.95	31.6	23.3	0
1991-09-30	27.45	32.7	22.8	0
1991-10-01	26.375	32.5	22.6	0
1991-10-02	26.7	30.6	22.8	0
1991-10-03	27.15	31.4	23.6	0
1991-10-04	27.6	32.2	23.8	0
1991-10-05	27.55	32.4	23.6	0
1991-10-06	27.25	32.6	22.8	0
1991-10-07	27.075	32.6	22.3	0
1991-10-08	25.65	31.2	21.4	0
1991-10-09	26.85	32.4	22.2	0
1991-10-10	26.55	32	22.2	0
1991-10-11	25.7	31	22.3	0
1991-10-12	26.85	31.5	22.8	0
1991-10-13	25.475	31	23.4	0
1991-10-14	24.95	31.2	22.2	14
1991-10-15	26.25	32.6	21.4	0
1991-10-16	26.7	32.4	22.5	0
1991-10-17	26.45	32.6	22.5	0
1991-10-18	26.275	31.4	22.2	0
1991-10-19	25.675	30.8	23.4	1
1991-10-20	26.175	32	22	10
1991-10-21	27.35	32.6	22.8	0
1991-10-22	27.95	32.8	23.3	0
1991-10-23	27.3	32	23.5	0
1991-10-24	26.9	32.4	23.8	0
1991-10-25	26.25	31	23	0
1991-10-26	26.925	31.2	22.6	0
1991-10-27	27.75	33	23.6	0
1991-10-28	27.2	31.2	23.2	0
1991-10-29	26.6	31.2	23.6	3
1991-10-30	25.525	32.2	22.8	71
1991-10-31	27.425	32.2	21.4	0
1991-11-01	25.9	32.6	22.6	0
1991-11-02	26.975	33.2	23.4	0
1991-11-03	26.475	31.8	22.9	0
1991-11-04	24.625	28.5	23.4	16
1991-11-05	25.825	33.2	22.5	15
1991-11-06	25.075	28.6	22.8	0
1991-11-07	25.25	29.8	23	0
1991-11-08	25.725	31.2	22.6	25
1991-11-09	24.15	27.4	22.2	0
1991-11-10	26.6	34.2	23	7
1991-11-11	24.325	29	22.2	0
1991-11-12	26.125	32.2	22.8	0
1991-11-13	24.475	27.8	21.8	2
1991-11-14	25.5	30	23	80
1991-11-15	24.775	31.2	22.4	0
1991-11-16	25.575	29.2	23.3	6
1991-11-17	24.425	32.5	22.2	0
1991-11-18	25.725	32.6	20.8	0
1991-11-19	25.925	29.3	22.8	2
1991-11-20	26.125	31	22.8	0
1991-11-21	26.525	31.2	23	8
1991-11-22	25.6	29.2	23.6	0
1991-11-23	26.3	32.8	23.2	2
1991-11-24	25.4	29	23	9
1991-11-25	25.95	33.4	21.8	17
1991-11-26	26.375	30.6	23.6	0
1991-11-27	26	30	23.8	0
1991-11-28	25.925	31.6	23.8	7
1991-11-29	26.075	32.7	22.8	46
1991-11-30	25.8	31.7	22.1	0
1991-12-01	26.8	32.4	22.2	39
1991-12-02	26.35	31	22.6	4
1991-12-03	26.05	29.4	23	0
1991-12-04	26.05	30	23.2	6
1991-12-05	25.15	28.2	23	34
1991-12-06	25.05	27.8	23.4	1
1991-12-07	25.5	29.3	23	2
1991-12-08	26.25	31	23	1
1991-12-09	26.1	30	22.8	0
1991-12-10	26	31.2	0	3
1991-12-11	27.25	32.4	23	47
1991-12-12	25.425	30.2	22	1
1991-12-13	26.7	31.3	23.8	0
1991-12-14	26.7625	31.2	24	0
1991-12-15	26.2	30	24.2	0
1991-12-16	27.15	30.8	24.3	0
1991-12-17	26.85	31.3	24.3	5
1991-12-18	26.75	31.8	23.8	7
1991-12-19	27.4	31.4	23.8	25
1991-12-20	25.5	27.2	23.8	1
1991-12-21	25.8	28	23.8	1
1991-12-22	25.675	29.4	23.3	0
1991-12-23	26.05	29	23.6	6
1991-12-24	26.05	31	23.1	0
1991-12-25	26.05	28.2	23	16
1991-12-26	26.15	31	23.2	5
1991-12-27	27.1	32	22	0
1991-12-28	26.225	31.2	22.7	23
1991-12-29	26	30.6	22.8	4
1991-12-30	26.775	31.6	23.2	25
1991-12-31	24.7	27.2	22.2	20
1992-01-01	25	29	22.8	3
1992-01-02	25.9	30.2	22.5	0
1992-01-03	26.3	30.9	22.6	1
1992-01-04	27.2	31.6	22.8	1
1992-01-05	24.175	29	21.8	2
1992-01-06	24.825	27.2	22.4	93
1992-01-07	24.7	28	22.8	22
1992-01-08	26.5	31	22.4	0
1992-01-09	27.1	31.4	23.6	0
1992-01-10	27.325	31.6	23.4	0
1992-01-11	27.325	31.6	22.6	0
1992-01-12	26.775	31.6	22.2	0
1992-01-13	25.4	30	22.2	15
1992-01-14	26.8	31	23.8	0
1992-01-15	24.375	30.9	22.5	26
1992-01-16	23.675	24.6	22.9	9
1992-01-17	24.825	29.8	22.8	3
1992-01-18	24.475	26.8	23	7
1992-01-19	25.05	29.8	22	25
1992-01-20	25.5	28.8	23.1	2
1992-01-21	25.95	31.6	22.1	0
1992-01-22	26	31.4	21.8	0
1992-01-23	26.275	31.7	21.5	0
1992-01-24	25.55	30.4	21.8	15
1992-01-25	25.45	31.2	23	6
1992-01-26	25.95	30.2	22.9	0
1992-01-27	24.5	29	22.3	14
1992-01-28	25.825	29.5	23.2	12
1992-01-29	26.05	29	23	2
1992-01-30	25.85	31.4	23	16
1992-01-31	24.65	29.4	22.8	12
1992-02-01	25.6	28.8	23.2	7
1992-02-02	25.525	30	22.3	0
1992-02-03	26.3	32.2	22.4	31
1992-02-04	26.175	28	23	3
1992-02-05	26.45	29.6	24	0
1992-02-06	26.45	31.4	23	1
1992-02-07	27.15	31	24	1
1992-02-08	26.075	32.1	23.3	1
1992-02-09	25.85	30.6	23.1	4
1992-02-10	26.075	31.6	23.8	0
1992-02-11	26.025	31	23	0
1992-02-12	25.95	30	23	0
1992-02-13	25.75	31.6	24	106
1992-02-14	25.4	32.5	20.7	0
1992-02-15	27.375	32.8	20.8	0
1992-02-16	25.8	30.4	23.6	1
1992-02-17	26.025	30.8	23.2	0
1992-02-18	27.05	33	21.2	4
1992-02-19	27.8	34.4	22.5	0
1992-02-20	25.475	27	25.1	14
1992-02-21	26.275	31.8	22.8	0
1992-02-22	26.15	32.8	23.1	0
1992-02-23	25.175	31	22	1
1992-02-24	25.7	31	21.8	0
1992-02-25	27	31.8	23	2
1992-02-26	26.225	31.5	23.1	0
1992-02-27	27.6	32.3	24.2	0
1992-02-28	26.375	31.9	23	0
1992-02-29	24.675	30.2	23.6	7
1992-03-01	25.85	31	22.8	26
1992-03-02	27.3	32.2	23.5	1
1992-03-03	27.825	33.9	23.7	0
1992-03-04	25.475	31.9	25.2	1
1992-03-05	25.3	30.1	23	6
1992-03-06	24.7	28	22.8	5
1992-03-07	26.5	31.8	22.8	0
1992-03-08	26.65	30.8	23.7	5
1992-03-09	26.3	33	22.4	30
1992-03-10	24.8	31.6	22.6	40
1992-03-11	26.9	32.4	21.4	0
1992-03-12	27.1	35	22	7
1992-03-13	26.65	31.8	22	0
1992-03-14	27.35	31.8	23.7	0
1992-03-15	27.775	32.8	24.6	0
1992-03-16	26.85	31	24.4	3
1992-03-17	26.85	32	23.6	0
1992-03-18	27.375	32.7	24	0
1992-03-19	27.65	34	23.8	0
1992-03-20	27.75	33.2	23.8	1
1992-03-21	26.15	28.6	23.6	2
1992-03-22	27.525	33.3	24.8	0
1992-03-23	26.825	31.2	24.2	0
1992-03-24	26.25	33	24	36
1992-03-25	25.85	32.2	23.4	2
1992-03-26	27.35	32.8	23.1	3
1992-03-27	26.625	32.4	23.6	0
1992-03-28	26.675	33.7	23.1	0
1992-03-29	26.125	30.6	23.4	8
1992-03-30	26.4	29.7	23.8	8
1992-03-31	26.2	31.4	23.8	3
1992-04-01	28.25	34.4	23.5	41
1992-04-02	27	31	23.4	9
1992-04-03	26.65	32.9	22.4	0
1992-04-04	26.05	29.2	24.4	1
1992-04-05	27.05	33.8	23.2	15
1992-04-06	26.05	31	22.4	0
1992-04-07	28	34.4	23	0
1992-04-08	26.825	34.4	23.8	3
1992-04-09	26.675	32.8	23.2	1
1992-04-10	26.45	32.8	23.1	5
1992-04-11	28.075	33.8	23.6	21
1992-04-12	26.5	32.2	22.4	0
1992-04-13	26.95	34	23.4	1
1992-04-14	27.4	33	23.7	3
1992-04-15	26.875	31.8	24	0
1992-04-16	26.3	32	23.3	0
1992-04-17	27.7	33.8	23.4	0
1992-04-18	27	34	23.6	1
1992-04-19	27.2	33	24.1	0
1992-04-20	28.475	34	23.6	0
1992-04-21	27.375	33.9	23.2	11
1992-04-22	28.35	34.2	23	0
1992-04-23	27.4	33	24.4	0
1992-04-24	28.15	34	23.6	0
1992-04-25	27	32	24	0
1992-04-26	27.125	32.3	23.6	14
1992-04-27	28.175	32.8	24	27
1992-04-28	27.25	34.2	23.2	5
1992-04-29	26.825	31	24.2	0
1992-04-30	27.95	34.4	23.6	30
1992-05-01	27.1	32.8	21.9	6
1992-05-02	27.125	32.2	24.2	1
1992-05-03	26.8	32.8	23.3	0
1992-05-04	26.825	31.2	23	0
1992-05-05	27	32.1	23	1
1992-05-06	27.3	31.6	23.2	1
1992-05-07	27.15	32	23.6	2
1992-05-08	27.075	31.8	24.4	46
1992-05-09	26.05	31.4	22.8	0
1992-05-10	26.75	32.4	23.6	0
1992-05-11	26.85	30	24.4	36
1992-05-12	26.75	32.4	22.2	0
1992-05-13	27.2	33	24	2
1992-05-14	27	30.5	24.4	0
1992-05-15	27.3	32.2	23.8	2
1992-05-16	28.6	33.8	23.3	0
1992-05-17	28.375	33.8	23.4	0
1992-05-18	28.8	34.2	23.2	0
1992-05-19	27.2	33	24.8	8
1992-05-20	26.95	32.4	22.8	0
1992-05-21	25.75	32.4	23.4	65
1992-05-22	27.45	32.8	23.2	2
1992-05-23	28.1	32.6	24.4	0
1992-05-24	28.05	32.8	24.2	0
1992-05-25	27.7	33	24	0
1992-05-26	27	32	23.7	0
1992-05-27	27.9	33.2	24	0
1992-05-28	26.75	30	24.1	2
1992-05-29	27.35	33.4	22.9	0
1992-05-30	26.8	31.8	22.6	0
1992-05-31	27.55	33.2	23	0
1992-06-01	26.925	32.4	23.7	0
1992-06-02	27.525	31.6	24.7	0
1992-06-03	26.85	31.4	23.6	2
1992-06-04	26.65	33.2	23.4	1
1992-06-05	27.4	32.6	23.2	0
1992-06-06	27.75	32.2	24	1
1992-06-07	26.975	32.4	23.9	0
1992-06-08	27.6	33.3	22.8	0
1992-06-09	25.375	30	22.5	2
1992-06-10	27.825	33.2	22.6	2
1992-06-11	28.15	33.2	23.6	0
1992-06-12	26.4	32.4	23.5	0
1992-06-13	26.6	32	22.9	7
1992-06-14	27.7	32.6	23	0
1992-06-15	26.875	32.4	23.6	0
1992-06-16	26.175	30	24	0
1992-06-17	27.55	33.2	23.8	7
1992-06-18	27.75	32.2	24.4	0
1992-06-19	27.05	32.1	23.2	2
1992-06-20	27.9	33.4	23.4	0
1992-06-21	28.375	33.4	23.6	0
1992-06-22	27.875	32.4	22.8	0
1992-06-23	27.9	32.8	23.8	0
1992-06-24	27.95	33.8	23.5	0
1992-06-25	26.95	33.8	22.5	3
1992-06-26	28.05	33.6	22.5	0
1992-06-27	27.6	33.2	22.6	0
1992-06-28	27.15	31.4	22.6	0
1992-06-29	28.2	34	22.6	0
1992-06-30	26.8	32.2	24.2	3
1992-07-01	25.625	33.8	21.7	0
1992-07-02	25.825	33.4	22.6	34
1992-07-03	25.275	32.4	21.8	0
1992-07-04	26.4	32.5	22.2	0
1992-07-05	27.7	33.8	23.4	0
1992-07-06	27.3	33.2	23.2	5
1992-07-07	25.2	33.3	22.4	26
1992-07-08	26.025	31.4	22.5	18
1992-07-09	26.9	31.6	22.8	0
1992-07-10	26.175	32.4	23	2
1992-07-11	26.6	32.2	22.4	0
1992-07-12	24.3	27.2	21.7	0
1992-07-13	25.15	29.2	23	5
1992-07-14	24.3	31.4	22.6	0
1992-07-15	26.65	32.2	23.1	0
1992-07-16	24.875	29.8	22.8	4
1992-07-17	25.1	27.8	22.6	0
1992-07-18	25.55	32.4	21	0
1992-07-19	25.175	29.2	22.4	0
1992-07-20	26.925	32.3	22	0
1992-07-21	27.7	32.7	23.23	0
1992-07-22	27.275	32.2	23	0
1992-07-23	27.2	33	23.2	0
1992-07-24	27.1	32.8	23.2	0
1992-07-25	27.225	32.8	23.3	0
1992-07-26	26.075	32	23.4	0
1992-07-27	26.4	32.8	22.4	0
1992-07-28	26.025	30	22.4	24
1992-07-29	26.35	32	22.6	0
1992-07-30	27.35	32.6	23.2	0
1992-07-31	27.475	33	22.9	0
1992-08-01	26.775	31.3	23.5	0
1992-08-02	26.375	31.6	22.5	14
1992-08-03	24.2	29.6	22.6	1
1992-08-04	26.05	31	22	0
1992-08-05	27.05	32.4	23.2	0
1992-08-06	27.25	33.6	22.6	0
1992-08-07	27.35	33.4	22.4	0
1992-08-08	27.425	32.7	22.3	0
1992-08-09	26.3	32	22.2	0
1992-08-10	26.85	31.8	22.4	0
1992-08-11	27.65	32.6	24	0
1992-08-12	27.3	33.2	23.3	0
1992-08-13	26.5	32.2	22.7	0
1992-08-14	27.15	32.3	23.1	0
1992-08-15	26.3	31.5	22.4	4
1992-08-16	26.3	32	21.8	6
1992-08-17	23.85	27.6	22	5
1992-08-18	26.1	31.8	21.6	0
1992-08-19	27.025	32.5	21.6	5
1992-08-20	27.675	33.4	22.6	6
1992-08-21	27.55	32.2	22.8	0
1992-08-22	25.2	31.8	22.2	17
1992-08-23	27.1	32.2	22.9	0
1992-08-24	25.025	29	23.2	0
1992-08-25	26.05	30.4	23.4	0
1992-08-26	27.05	29.8	23.6	7
1992-08-27	26.175	32.4	22	0
1992-08-28	27.5	34.6	21.8	8
1992-08-29	26.35	31.2	22.4	0
1992-08-30	27.2	32.9	22.7	23
1992-08-31	26.775	31.3	23	18
1992-09-01	24.85	32.4	21.8	0
1992-09-02	27.25	32.74	22	9
1992-09-03	25.4	25	22.6	0
1992-09-04	25.3	29.6	21.8	0
1992-09-05	27.15	32.4	22.7	0
1992-09-06	26.575	32.4	22.4	0
1992-09-07	24.45	29.2	23.2	15
1992-09-08	25.8	32.6	21.4	0
1992-09-09	23.65	30.6	21.8	46
1992-09-10	26.1	32.4	21.2	0
1992-09-11	24.7	29.6	22.8	26
1992-09-12	26.325	33.5	22.8	0
1992-09-13	26.05	30.3	21.5	1
1992-09-14	26.2	31	22.2	0
1992-09-15	26.25	30.4	21.8	0
1992-09-16	26.8	32.2	22.2	5
1992-09-17	26.75	33	22.5	0
1992-09-18	27.65	32.6	22.5	69
1992-09-19	24.75	30	20.4	3
1992-09-20	26.95	30.5	22.6	0
1992-09-21	26.9	32	22.6	0
1992-09-22	26.35	32.4	23.4	2
1992-09-23	26.175	31	22.3	5
1992-09-24	25.95	33.8	22.8	20
1992-09-25	25.775	31	22.8	3
1992-09-26	25.25	31.6	23	0
1992-09-27	26.5	31.4	23.2	26
1992-09-28	27.1	32	23	0
1992-09-29	26.625	32.8	21.9	0
1992-09-30	27.35	32.8	22	0
1992-10-01	26.525	29	22.8	27
1992-10-02	25.525	29.5	22.9	7
1992-10-03	26.65	31.6	22.4	0
1992-10-04	26.9	32.2	23.5	4
1992-10-05	26.225	32.5	22.3	0
1992-10-06	27.125	32.3	22.3	0
1992-10-07	26.7	33	23.2	0
1992-10-08	27	32	23	0
1992-10-09	26.65	33.2	22.6	23
1992-10-10	25.3	28.8	22.6	0
1992-10-11	26.75	32	22.8	0
1992-10-12	25.5	32	22.8	3
1992-10-13	27.7	33.6	23.6	0
1992-10-14	27.7	32.6	23	21
1992-10-15	26.15	31.4	21.6	0
1992-10-16	27.15	32.8	23.1	45
1992-10-17	25.075	32.7	22.6	61
1992-10-18	25.715	32.9	21.4	7
1992-10-19	26.475	31.9	22.6	0
1992-10-20	25.2	28.6	23	11
1992-10-21	27.05	32.6	22.6	0
1992-10-22	27.65	33.2	23	0
1992-10-23	27.125	33.2	24.2	0
1992-10-24	26.45	31	23.4	22
1992-10-25	26.15	31.2	22	0
1992-10-26	26.5	30.5	23	0
1992-10-27	26.45	32.2	21.6	2
1992-10-28	26.25	30.4	23.1	0
1992-10-29	26.05	31.4	23.2	8
1992-10-30	24.975	32	22.4	22
1992-10-31	26.375	30.3	22	72
1992-11-01	26.45	31.5	22.8	2
1992-11-02	26.2	31.6	22.2	15
1992-11-03	25.85	30.4	21.3	3
1992-11-04	25.525	30.6	21.9	0
1992-11-05	26.025	30.9	22.1	0
1992-11-06	27.075	29.8	23.4	1
1992-11-07	26.9	31.5	23	0
1992-11-08	27.6	33.2	23.2	47
1992-11-09	25.25	29.2	22.2	0
1992-11-10	25.7	29.5	22.9	0
1992-11-11	26.425	29.4	22.8	0
1992-11-12	26.3	31.6	23	0
1992-11-13	26.75	32	23	13
1992-11-14	27.7	33.4	23	0
1992-11-15	26.75	31.6	23.7	1
1992-11-16	24.475	30.2	22.8	38
1992-11-17	25.475	30	22.8	0
1992-11-18	25.475	29.7	23.7	4
1992-11-19	26.75	32.5	22.2	0
1992-11-20	27.3	31.8	22.2	17
1992-11-21	25.95	29.8	22.4	1
1992-11-22	26.7	31.4	22.3	4
1992-11-23	25.075	28.5	22.1	1
1992-11-24	26.825	31.2	22.3	0
1992-11-25	25.7	31.4	22.2	1
1992-11-26	25.75	30	22	0
1992-11-27	25.85	29.8	23	3
1992-11-28	26.125	30.5	22.8	3
1992-11-29	24.95	27	22.4	6
1992-11-30	25.625	28.4	23.2	46
1992-12-01	24.825	28.3	22.9	7
1992-12-02	23.85	29.8	22.4	23
1992-12-03	25	29.4	22.3	35
1992-12-04	23.65	24.6	22.6	28
1992-12-05	25.05	29.7	22.8	3
1992-12-06	25.375	29	22.5	3
1992-12-07	26.7	31.6	22.6	4
1992-12-08	26.775	31.8	22.6	0
1992-12-09	27.7	32.2	23.7	55
1992-12-10	25.75	30.4	21.6	0
1992-12-11	24.225	27	21.8	34
1992-12-12	26.075	31	22	0
1992-12-13	26.3	29.6	22	89
1992-12-14	24.65	28.2	21.6	44
1992-12-15	24.85	28	22.7	1
1992-12-16	26.075	29.8	23.4	0
1992-12-17	25.075	29.4	23	4
1992-12-18	25.15	28.6	22.7	2
1992-12-19	25.925	29.5	22.8	0
1992-12-20	26.15	29.6	22.8	0
1992-12-21	25.95	30.6	23	0
1992-12-22	26.675	31.2	22.7	5
1992-12-23	26.15	30.4	22.4	0
1992-12-24	27.025	31.4	22.8	2
1992-12-25	26.35	32	22	0
1992-12-26	27.4	33	22.4	0
1992-12-27	26.05	30.4	24.5	35
1992-12-28	26.425	32.2	22.5	5
1992-12-29	25.625	30.6	22.6	5
1992-12-30	25.575	29.4	23	4
1992-12-31	25.75	29	22.8	7
1993-01-01	24.725	27.6	23	8
1993-01-02	25.55	29	22.9	5
1993-01-03	25.625	29.4	22.4	2
1993-01-04	25.975	31.1	22.4	5
1993-01-05	26.625	31.2	22.8	13
1993-01-06	25.55	28.5	23.2	31
1993-01-07	25.2	28.6	22.8	16
1993-01-08	26.7	31.2	23	0
1993-01-09	26.55	31.2	23.2	2
1993-01-10	26.05	30.4	23..6	1
1993-01-11	25.525	30	22.9	2
1993-01-12	25.675	30.2	22.6	1
1993-01-13	25.7	29	22.6	1
1993-01-14	26.5	31	23.5	0
1993-01-15	25.75	30	23.1	12
1993-01-16	26	32	23	23
1993-01-17	24.5	28.1	21.8	0
1993-01-18	25.05	30.4	22	3
1993-01-19	25.35	27.6	21.8	0
1993-01-20	25.85	30	22.9	29
1993-01-21	24.325	26.5	22.6	42
1993-01-22	23.075	25.5	21.8	5
1993-01-23	25.95	31	21.8	18
1993-01-24	25.2	29	22.2	0
1993-01-25	25.8	29.6	22.8	4
1993-01-26	25.6	30.2	22	0
1993-01-27	25.925	31.2	22.7	0
1993-01-28	26.225	30.5	23	16
1993-01-29	26.75	30.7	23.4	0
1993-01-30	24.975	28.5	23.4	0
1993-01-31	25.1	28.4	22.8	4
1993-02-01	26.2	30.6	23	0
1993-02-02	26.6	30.6	23.7	1
1993-02-03	26.075	29.4	23.6	27
1993-02-04	25.35	28.5	22.9	0
1993-02-05	25.95	30	23	0
1993-02-06	25.75	30.2	22.6	0
1993-02-07	26.2	30.6	22.2	0
1993-02-08	26.025	31.2	22.4	0
1993-02-09	25.8	32.6	21.4	0
1993-02-10	26.75	32	22.8	0
1993-02-11	26.9	31.2	22	0
1993-02-12	25.2	30.2	23.8	37
1993-02-13	25.85	29.8	22.5	0
1993-02-14	25.575	30.8	22.4	7
1993-02-15	26.9	31.8	22.2	5
1993-02-16	26.05	31.2	22.7	0
1993-02-17	25.65	30.2	22.8	9
1993-02-18	27.15	31.8	23.4	0
1993-02-19	26.65	31.6	21.7	0
1993-02-20	26.875	32.4	22	0
1993-02-21	25.225	31.5	22.4	1
1993-02-22	25.575	29.3	21.9	30
1993-02-23	25.775	30.8	22.8	0
1993-02-24	25.35	31.2	20.6	0
1993-02-25	26.85	33.4	20.5	1
1993-02-26	26.675	32	22.3	0
1993-02-27	26.525	31.9	22.2	3
1993-02-28	26.7	31.6	22.4	0
1993-03-01	26.45	31.2	22.4	4
1993-03-02	25.55	31.4	21.8	1
1993-03-03	25.4	30.5	23.7	54
1993-03-04	25.15	29.3	22.5	0
1993-03-05	26.4	32.5	21.6	0
1993-03-06	27.425	32.5	22	0
1993-03-07	23.9	24.6	22.2	4
1993-03-08	25.65	29.8	23	0
1993-03-09	25.1	29.4	21.8	1
1993-03-10	26.15	30.2	21.8	0
1993-03-11	26.525	30.8	23.2	0
1993-03-12	25.175	29.6	23.2	2
1993-03-13	26.125	31.8	22.2	23
1993-03-14	26.75	30.5	21.8	0
1993-03-15	26.85	31.6	23	0
1993-03-16	27.5	32.2	22.8	0
1993-03-17	28.65	33.6	23.7	0
1993-03-18	26.4	31	21.4	2
1993-03-19	27.65	32.8	23.2	0
1993-03-20	27.2	32.9	23.4	1
1993-03-21	24.45	32	23	22
1993-03-22	26.15	32.4	22.5	1
1993-03-23	25.6	31.6	22.6	10
1993-03-24	24.875	31.7	22.5	71
1993-03-25	24.7	26.5	23.6	15
1993-03-26	25.775	29.8	22.6	13
1993-03-27	26.75	32.4	22.5	63
1993-03-28	25.425	30	21.8	0
1993-03-29	26.625	32.4	23.4	43
1993-03-30	26	31.2	22.2	26
1993-03-31	26.05	30.5	22.2	1
1993-04-01	26.2	31.4	22.4	0
1993-04-02	26.3	34	23.5	32
1993-04-03	26.4	32	22.1	4
1993-04-04	27.1	33.1	22.2	0
1993-04-05	25.375	30.8	23.5	1
1993-04-06	26.4	30.6	22.8	2
1993-04-07	27.05	31.2	23.4	3
1993-04-08	26.55	32	23	8
1993-04-09	26.35	32.2	21.8	1
1993-04-10	26.775	32.5	21.8	0
1993-04-11	28	33	24.2	0
1993-04-12	26.45	30.2	24.2	2
1993-04-13	27.25	32.6	23.8	4
1993-04-14	24.975	33	22	0
1993-04-15	26.95	32.5	22.5	25
1993-04-16	26.65	32.9	22.8	17
1993-04-17	26.75	32.2	23.2	0
1993-04-18	26.7	31.8	23.2	27
1993-04-19	27.55	32.6	23.4	0
1993-04-20	25.85	33.2	23.3	3
1993-04-21	27.125	33.5	23.7	0
1993-04-22	26.15	31.2	23	43
1993-04-23	25.525	29.7	23	1
1993-04-24	28.475	33.6	22.4	0
1993-04-25	27.8	32.2	24.2	0
1993-04-26	27.5	33.6	24.1	0
1993-04-27	26.475	33	23.8	4
1993-04-28	26.775	32.4	23.6	0
1993-04-29	26.75	31.8	23.8	2
1993-04-30	26.3	32.6	23.4	42
1993-05-01	25.6	32	23.4	10
1993-05-02	26.75	30.5	23.2	0
1993-05-03	27.825	32.7	24.6	4
1993-05-04	26.45	32	22.7	8
1993-05-05	25.75	31.6	23.4	5
1993-05-06	27.475	31	23.4	3
1993-05-07	27.1	33.4	23	0
1993-05-08	27.5	32	23	0
1993-05-09	26.8	32	23.6	0
1993-05-10	26.6	30	23.6	39
1993-05-11	25.85	31.2	21.8	0
1993-05-12	27.9	31.5	22	35
1993-05-13	26.65	31.6	21.4	0
1993-05-14	27.3	32	21.2	12
1993-05-15	25.875	32	22.7	27
1993-05-16	26.7	32	22.8	0
1993-05-17	26.05	31.5	23.8	8
1993-05-18	26.65	32	22.4	0
1993-05-19	26.925	31.5	23.4	0
1993-05-20	27.3	32.8	23.4	2
1993-05-21	26.1	32.5	23.8	24
1993-05-22	26.425	30.3	22.8	0
1993-05-23	26.7	31	23.2	5
1993-05-24	27	32	23.4	0
1993-05-25	27	31.4	24	0
1993-05-26	26	29	23.6	0
1993-05-27	25.9	32.1	22.8	3
1993-05-28	27.375	32	23.8	10
1993-05-29	26.775	33	23.6	50
1993-05-30	25.95	32.2	22.8	1
1993-05-31	26.625	32.2	23.2	25
1993-06-01	26.9	30.5	24.3	0
1993-06-02	26.7	32.2	23.2	1
1993-06-03	27.3	32.9	23.8	0
1993-06-04	27.45	32.6	23	0
1993-06-05	28.1	33	23	4
1993-06-06	26.6	31.8	23	0
1993-06-07	27.9	33.4	23.3	0
1993-06-08	27.75	33.5	23.4	0
1993-06-09	28.35	33.1	23.4	0
1993-06-10	28.8	33.2	25.1	0
1993-06-11	28.55	33	24.4	0
1993-06-12	28.65	33	24.4	0
1993-06-13	28	33.4	24.6	1
1993-06-14	27.7	33.2	24.5	54
1993-06-15	26.75	32.6	22.6	50
1993-06-16	27.1	32.8	22.4	0
1993-06-17	27.05	32	22.2	0
1993-06-18	28.25	33.4	23.6	0
1993-06-19	27.25	32.8	23.2	22
1993-06-20	26.05	31.4	22.3	0
1993-06-21	26.15	31.4	22.6	0
1993-06-22	27.375	32.4	22	0
1993-06-23	26.625	30.6	22.2	6
1993-06-24	26.15	31.7	22.6	1
1993-06-25	26.95	31.6	23	0
1993-06-26	27.3	32.3	22.4	0
1993-06-27	27.275	32.8	22.2	0
1993-06-28	26.875	32.2	23.2	8
1993-06-29	25.375	28.5	23.1	9
1993-06-30	24.65	27.4	22.6	3
1993-07-01	25.25	28.4	22.7	0
1993-07-02	26.2	30.4	22.7	0
1993-07-03	26.725	31.4	22.4	0
1993-07-04	26.225	30.6	23	10
1993-07-05	25.925	29.6	22.3	1
1993-07-06	26.475	30	22.6	0
1993-07-07	25.8	30.6	23	0
1993-07-08	26.9	31.4	22.4	0
1993-07-09	25.8	33.6	22.2	10
1993-07-10	26.75	31.8	22.8	0
1993-07-11	27.1	31.8	22	0
1993-07-12	26.85	32.4	22.9	0
1993-07-13	27.1	31.6	23	0
1993-07-14	26.7	32.6	23.2	0
1993-07-15	27.175	31.6	22.6	0
1993-07-16	26.025	30.4	22.8	0
1993-07-17	26.2	30	22.2	3
1993-07-18	26.95	32.4	22.6	0
1993-07-19	26.9	32.4	21.8	0
1993-07-20	26.8	31.6	22.3	0
1993-07-21	27	32.6	22.2	0
1993-07-22	26.2	32.6	23.2	0
1993-07-23	26.2	30.8	22.4	0
1993-07-24	26.55	30.6	23.2	0
1993-07-25	26.55	29	22.8	0
1993-07-26	26.15	30.4	22.2	0
1993-07-27	25.35	28.2	22.4	0
1993-07-28	27.05	32	22.6	0
1993-07-29	27.525	32.6	22.8	0
1993-07-30	25.8	30	23.4	0
1993-07-31	26.45	30.2	19.8	0
1993-08-01	25.95	32.2	21.6	0
1993-08-02	27	32.9	22	0
1993-08-03	27.425	33.4	23	0
1993-08-04	27.55	33.7	23.9	0
1993-08-05	27.875	33	23.4	3
1993-08-06	27.75	33.4	23.2	0
1993-08-07	27.45	32.6	23.2	0
1993-08-08	28.4	33.6	23.6	0
1993-08-09	27.25	32.6	22.9	0
1993-08-10	26.65	32.8	22.1	0
1993-08-11	27	32.4	22.2	0
1993-08-12	27.5	32.8	23.4	0
1993-08-13	27.675	33	23.1	0
1993-08-14	27.5	32.4	23.2	0
1993-08-15	27.9	33.2	23.6	0
1993-08-16	26.9	32.8	23.6	0
1993-08-17	27.05	33.7	22.6	1
1993-08-18	27.825	33.9	22.6	0
1993-08-19	27.5	33.1	22	0
1993-08-20	27.225	32.3	21.8	0
1993-08-21	26.925	32.3	21.4	0
1993-08-22	26.4	32.8	21	0
1993-08-23	26.7	32.8	21.2	0
1993-08-24	27.4	33	21.2	0
1993-08-25	26.2	31.2	23.1	13
1993-08-26	24.5	31.4	21.2	0
1993-08-27	26.1	31.2	21.1	0
1993-08-28	26.3	30.8	22	0
1993-08-29	27.45	32	22.6	0
1993-08-30	26.975	32.8	22.8	2
1993-08-31	26.85	32.8	22.4	0
1993-09-01	27.5	32.4	22.8	0
1993-09-02	27.375	32.8	22.6	0
1993-09-03	27.1	32.6	23	0
1993-09-04	27.75	33.4	22.8	0
1993-09-05	27.5	33.4	22.8	1
1993-09-06	25.8	32.2	22.2	4
1993-09-07	24.45	28	22.4	0
1993-09-08	25.65	30.2	22.4	0
1993-09-09	26.55	32.4	20.8	0
1993-09-10	26.275	33.6	20.4	0
1993-09-11	26.4	32.6	20.4	0
1993-09-12	26.325	32.4	21.2	0
1993-09-13	26.5	31.8	20.4	0
1993-09-14	27.25	33	22.2	0
1993-09-15	25.85	32.5	22.4	0
1993-09-16	27.05	32.6	21.6	0
1993-09-17	27.4	33.2	21.3	0
1993-09-18	27.225	32.8	22.4	0
1993-09-19	27.1	33.2	20.4	0
1993-09-20	26.5	32.4	22.2	5
1993-09-21	26.3	32.2	22	0
1993-09-22	27.25	32.4	22.6	0
1993-09-23	27.5	33.3	22.8	0
1993-09-24	27.85	33.2	23.2	0
1993-09-25	28.15	33.6	22.4	0
1993-09-26	26.45	31.8	23.5	21
1993-09-27	27.175	32.6	23	2
1993-09-28	26.075	33.2	22	0
1993-09-29	27.2	34	21.9	0
1993-09-30	27.5	33.2	22	0
1993-10-01	27.35	33.6	23.4	0
1993-10-02	28.55	32.4	23.6	0
1993-10-03	28.45	33.6	21.8	0
1993-10-04	25.975	31.8	22	15
1993-10-05	27.05	33	22	33
1993-10-06	26.5	29.8	22	0
1993-10-07	27.85	33.6	24.6	0
1993-10-08	28.525	32.4	23.6	0
1993-10-09	28.175	33.2	23	4
1993-10-10	25.05	29.8	22.3	6
1993-10-11	25.8	31.4	22.1	0
1993-10-12	25.95	31.4	22.1	19
1993-10-13	25.775	30.8	22.2	0
1993-10-14	27.65	33.4	22.2	11
1993-10-15	25.9	31.4	22	10
1993-10-16	25.65	30.8	21	33
1993-10-17	27.25	33.2	24	0
1993-10-18	26.65	31.6	22.9	0
1993-10-19	26.75	31.6	21.6	0
1993-10-20	27.525	33.6	20.6	0
1993-10-21	25.825	31	21.8	6
1993-10-22	26.525	33.2	21.6	21
1993-10-23	27.6	32.8	23.8	0
1993-10-24	27.375	33.3	23	13
1993-10-25	27.6	33.2	22.8	0
1993-10-26	26.55	32.6	23	1
1993-10-27	26.2	31.8	23.4	2
1993-10-28	26.575	31.6	23.1	6
1993-10-29	27.325	32.1	23	2
1993-10-30	24.925	30	22	15
1993-10-31	26.475	32.6	24	0
1993-11-01	26.475	31.6	24	0
1993-11-02	25.675	30	22.8	0
1993-11-03	27.05	32.4	23	1
1993-11-04	26.7	31.2	23.2	8
1993-11-05	26.05	31	22.4	22
1993-11-06	26.025	30.4	22	0
1993-11-07	26.7	30.6	24.4	7
1993-11-08	25.1	30.8	23	2
1993-11-09	27.7	32.8	24.2	0
1993-11-10	26.825	29	24.6	4
1993-11-11	26.85	31.4	23.2	25
1993-11-12	25.8	31.8	22.8	2
1993-11-13	26.525	32.4	22.3	0
1993-11-14	24.8	29	22.4	5
1993-11-15	25.85	31.8	22.2	2
1993-11-16	27.125	33	22	1
1993-11-17	26.475	30.4	23.3	4
1993-11-18	26.95	32.8	23	25
1993-11-19	26.45	29	23	17
1993-11-20	26.75	32.2	22.2	0
1993-11-21	26.775	31.2	22.8	0
1993-11-22	27.125	31.8	22.7	23
1993-11-23	26.625	32.2	23	9
1993-11-24	26.5	31.8	21.4	22
1993-11-25	25.85	30.4	22.3	5
1993-11-26	26.325	31.4	22.4	0
1993-11-27	26.9	31.8	22.8	3
1993-11-28	26.4	30	23	12
1993-11-29	26.575	31.4	23	0
1993-11-30	27.225	31.8	19.2	1
1993-12-01	26.2	30.8	21.8	0
1993-12-02	26.65	33	21.6	27
1993-12-03	26.725	32.4	22.8	16
1993-12-04	26.9	30.8	21.6	5
1993-12-05	25.15	28.8	22.6	0
1993-12-06	27.8	32.8	23.2	12
1993-12-07	25.925	30.8	23.2	1
1993-12-08	26.4	31.6	19.9	3
1993-12-09	26.8	30.4	23.2	7
1993-12-10	26.725	30.8	23.3	9
1993-12-11	25.45	30.2	23.1	30
1993-12-12	26.45	31	23.2	22
1993-12-13	26.75	32	22.8	0
1993-12-14	28.05	32	22.8	0
1993-12-15	26.05	32.2	22.8	25
1993-12-16	26.1	32.3	21.1	0
1993-12-17	26.7	30	21.2	1
1993-12-18	26.9	31.4	21.2	0
1993-12-19	27.25	32.5	23.8	0
1993-12-20	27.2	32	23.8	2
1993-12-21	26.35	31.8	23	6
1993-12-22	26.35	30	23	0
1993-12-23	25.75	28.2	23.2	0
1993-12-24	26.35	31.2	21.3	4
1993-12-25	25.9	31.2	22.8	3
1993-12-26	26.4	31	22.7	1
1993-12-27	26.5	30.8	23.5	5
1993-12-28	26.25	29	23.6	8
1993-12-29	25.8	30	23.8	1
1993-12-30	25.2	29.4	23	1
1993-12-31	25.725	30	23.2	10
1994-01-01	25.65	29.8	23	0
1994-01-02	26.55	30.4	23.8	0
1994-01-03	27.15	31.2	22.2	1
1994-01-04	25.375	29	22.2	0
1994-01-05	26.65	30.2	23.4	19
1994-01-06	26.1	30.2	23	10
1994-01-07	26.05	29.4	22.7	0
1994-01-08	25.525	30.7	20.2	0
1994-01-09	25.45	30.8	23	0
1994-01-10	25.975	30.1	22	0
1994-01-11	25.8	30.8	23.2	3
1994-01-12	26.075	29.7	22.8	18
1994-01-13	25.55	28.8	23.2	7
1994-01-14	25.45	28.8	23	7
1994-01-15	24.7	27.4	22.5	2
1994-01-16	25.775	30.8	22.1	0
1994-01-17	26.15	30.9	23.4	0
1994-01-18	26.1	28.9	23	0
1994-01-19	25.7	30	23.2	0
1994-01-20	26.45	29.7	23.4	0
1994-01-21	26.4	30.6	23	0
1994-01-22	26.25	30.8	22.7	0
1994-01-23	25.8	29	22.5	0
1994-01-24	25.9	31	22	0
1994-01-25	25.95	30.7	23.6	0
1994-01-26	26.75	30	23.2	0
1994-01-27	26.8	31.2	24.2	0
1994-01-28	25.7	30.2	22.6	2
1994-01-29	25.675	29.6	23	0
1994-01-30	26.05	30.8	22.6	17
1994-01-31	25.2	28.8	23.2	0
1994-02-01	25.125	30	23.1	5
1994-02-02	26.675	30.9	22.6	21
1994-02-03	25.65	30.3	22.6	4
1994-02-04	25.4	29.4	23.4	9
1994-02-05	25.5	31.8	22.6	7
1994-02-06	25.8	29.6	21.4	12
1994-02-07	25.85	30.8	22	0
1994-02-08	27	31.2	22.4	46
1994-02-09	26.4	31.4	22.1	5
1994-02-10	24.975	27.7	22.8	8
1994-02-11	25.8	28.9	22.6	1
1994-02-12	23.85	31	22.7	33
1994-02-13	26.25	30	22.8	0
1994-02-14	26.7	32.4	23.2	0
1994-02-15	27.05	31.6	23	0
1994-02-16	23.675	30.4	22.2	19
1994-02-17	25.85	32	22	0
1994-02-18	26.05	32.1	22	0
1994-02-19	26.25	32	22	0
1994-02-20	27.65	33.8	24.2	0
1994-02-21	27.525	32.2	22.8	0
1994-02-22	26.975	32.4	23	0
1994-02-23	27.15	33.2	24	0
1994-02-24	28	32.8	24	3
1994-02-25	28.15	33.3	24	0
1994-02-26	27.425	32.2	23.2	0
1994-02-27	27.5	31.2	23.2	0
1994-02-28	27.85	31.7	22.8	0
1994-03-01	26.5	30.6	23	15
1994-03-02	24.6	29.2	22.4	10
1994-03-03	24.3	29.6	22.8	43
1994-03-04	24.4	27	23	5
1994-03-05	25.625	29.6	21.1	0
1994-03-06	26.8	30.8	22	22
1994-03-07	24.125	27	23.1	0
1994-03-08	27.4	32.2	23.1	1
1994-03-09	26.275	30.4	22.8	1
1994-03-10	24.675	27.6	23	3
1994-03-11	27.05	32.8	22.4	5
1994-03-12	25.3	30.6	21.9	17
1994-03-13	24.3	28.2	21.2	7
1994-03-14	25.3	29.6	22	3
1994-03-15	25.775	29.6	21.8	0
1994-03-16	25.85	31.4	23.2	0
1994-03-17	27	31.8	22.6	7
1994-03-18	25.575	31	22.8	9
1994-03-19	26.2	32	22.8	0
1994-03-20	27	31	23.1	0
1994-03-21	26.8	32	23.1	0
1994-03-22	26.575	32	22.2	14
1994-03-23	25.3	30.5	23.2	0
1994-03-24	26.25	30.4	22.5	0
1994-03-25	25.325	31.9	22.8	9
1994-03-26	24.525	29.2	23.2	15
1994-03-27	26	30.8	22.8	6
1994-03-28	25.15	30	22.7	0
1994-03-29	26.65	33.3	21	9
1994-03-30	25.9	30.8	21.8	0
1994-03-31	26.525	31.2	21.4	30
1994-04-01	26.75	31.4	23.2	0
1994-04-02	25.925	30.9	23	0
1994-04-03	26.575	30.8	21.6	0
1994-04-04	25.85	32.8	23.1	0
1994-04-05	26.1	29.2	23.6	0
1994-04-06	27.375	32.6	22	2
1994-04-07	26.75	33	22.4	0
1994-04-08	27.175	32.5	22.1	95
1994-04-09	25.1	29.2	23.6	3
1994-04-10	26.95	32.2	22.6	0
1994-04-11	26.725	33.6	23.2	5
1994-04-12	24.6	29.6	22.6	16
1994-04-13	25	28.4	22.7	27
1994-04-14	26.05	32.1	22.6	0
1994-04-15	26.8	32.1	22.8	0
1994-04-16	26.3	29.9	23	0
1994-04-17	24.65	26.8	21.8	3
1994-04-18	26.35	31.8	22	3
1994-04-19	25.9	30.2	23.8	0
1994-04-20	27	30.4	21	46
1994-04-21	25.825	31	21.9	23
1994-04-22	25.575	31.8	22.5	11
1994-04-23	26.175	31	23	1
1994-04-24	26.95	32.1	23.1	50
1994-04-25	26.55	31.4	23.6	0
1994-04-26	26.575	31.4	23.8	1
1994-04-27	26.475	29.2	23.8	0
1994-04-28	27.55	32.4	23.2	0
1994-04-29	27.075	32.4	23.9	0
1994-04-30	26.975	33	23.1	1
1994-05-01	26.8	32.4	23.2	0
1994-05-02	26.75	32	23.4	14
1994-05-03	26.2	32.6	23	2
1994-05-04	27.85	33	23	7
1994-05-05	26.275	32	23.2	11
1994-05-06	26.65	31.4	22.7	0
1994-05-07	26.65	30.6	23.5	0
1994-05-08	27.675	32	21.9	0
1994-05-09	25.625	30.4	22.2	0
1994-05-10	26.1	31	22.3	0
1994-05-11	27.75	33	23.6	0
1994-05-12	27.9	33	20.6	29
1994-05-13	26.5	32.8	22	6
1994-05-14	27.8	32.8	23.6	1
1994-05-15	27.7	31.8	24.8	2
1994-05-16	28.1	33	24.3	0
1994-05-17	26.925	32	24.2	37
1994-05-18	27.425	30.7	23.8	18
1994-05-19	25.875	31.2	22.4	6
1994-05-20	26.65	32.2	22.6	1
1994-05-21	26.65	31	23.8	9
1994-05-22	25.7	31.6	23.2	0
1994-05-23	27.4	32	23.3	0
1994-05-24	27.2	32	23.1	0
1994-05-25	26.975	31.8	24	0
1994-05-26	26.8	29.8	24	0
1994-05-27	27.65	32.2	23.3	0
1994-05-28	27.25	32.4	23.2	0
1994-05-29	26.45	33.2	22.6	0
1994-05-30	26.6	32.4	22.4	0
1994-05-31	26.85	32	23	0
1994-06-01	26.75	31.4	23.2	0
1994-06-02	25.925	30.9	23	0
1994-06-03	26.575	30.8	21.6	0
1994-06-04	25.85	32.8	23.1	0
1994-06-05	26.1	29.2	23.6	0
1994-06-06	27.375	32.6	22	2
1994-06-07	26.75	33	22.4	0
1994-06-08	27.175	32.5	22.1	95
1994-06-09	25.1	29.2	23.6	3
1994-06-10	26.95	32.2	22.6	0
1994-06-11	26.725	33.6	23.2	5
1994-06-12	24.6	29.6	22.6	16
1994-06-13	25	28.4	22.7	27
1994-06-14	26.05	32.1	22.6	0
1994-06-15	26.8	32.1	22.8	0
1994-06-16	26.3	29.9	23	0
1994-06-17	24.65	26.8	21.8	3
1994-06-18	26.15	31.8	22	3
1994-06-19	26.1	30.2	23.8	0
1994-06-20	26.6	30.4	21	46
1994-06-21	25.85	31	21.9	23
1994-06-22	26.3	31.8	22.5	11
1994-06-23	25.9	31	23	1
1994-06-24	26.475	32.1	23.1	50
1994-06-25	27.2	31.4	23.6	0
1994-06-26	26.925	31.4	23.8	1
1994-06-27	26.85	29.2	23.8	0
1994-06-28	28.15	32.4	23.2	0
1994-06-29	27.1	32.4	23.9	0
1994-06-30	27.025	33	23.1	1
1994-07-01	26.15	32.2	21.7	26
1994-07-02	26.25	32	22.3	0
1994-07-03	25.9	31.7	22.8	0
1994-07-04	26.65	32.4	23	0
1994-07-05	27.025	31.7	22.6	0
1994-07-06	26.65	32.4	23.1	0
1994-07-07	26.85	31.2	22.2	0
1994-07-08	26.45	32	21.8	0
1994-07-09	25.6	31.8	21.2	0
1994-07-10	26.2	31.6	21.2	0
1994-07-11	26.075	31.7	21.7	0
1994-07-12	26.05	32.3	22.6	0
1994-07-13	26.725	32.2	22.1	0
1994-07-14	27.3	32.6	23.2	0
1994-07-15	27.425	32	22.8	0
1994-07-16	27.225	32.6	21	0
1994-07-17	27	32.8	21.2	0
1994-07-18	26.5	33.2	21.9	0
1994-07-19	26.775	31.8	22	0
1994-07-20	26.225	32	22.6	0
1994-07-21	27	32.3	22.4	0
1994-07-22	26.95	33	22.6	0
1994-07-23	27.25	32.8	22.4	0
1994-07-24	26.7	32.6	22.2	0
1994-07-25	26.5	32.6	21.7	0
1994-07-26	26.55	32.6	20.9	0
1994-07-27	25.875	32.8	20.7	0
1994-07-28	25.55	31.2	20	0
1994-07-29	25.45	32.8	20.4	0
1994-07-30	25.6	32.8	20.6	0
1994-07-31	26.575	32	22	3
1994-08-01	26.6	32.8	21.9	0
1994-08-02	27.2	33.8	21.8	0
1994-08-03	26.825	33.7	21.6	0
1994-08-04	26.675	33	22.7	0
1994-08-05	27.4	33	22.8	0
1994-08-06	27.45	32.8	22.5	0
1994-08-07	28.225	33.7	22.2	0
1994-08-08	26.95	33.6	20	0
1994-08-09	26.6	33.8	21.8	0
1994-08-10	27.2	33.7	21.6	0
1994-08-11	26.6	33.2	21.6	0
1994-08-12	26.775	33.4	22.2	0
1994-08-13	26.8	32.8	22.8	0
1994-08-14	27.325	33.2	22	0
1994-08-15	26.45	32	22	0
1994-08-16	26.95	32.8	21.8	0
1994-08-17	26.875	32.8	22.2	0
1994-08-18	26.75	32.4	22.1	0
1994-08-19	27.1	33	20	0
1994-08-20	26.3	33	20.4	0
1994-08-21	26.525	33	21.8	0
1994-08-22	27.2	33.2	20.6	0
1994-08-23	27.25	33.4	23	0
1994-08-24	27.6	33.3	22.4	0
1994-08-25	26.8	32	22	0
1994-08-26	26.75	32.2	21.8	0
1994-08-27	26.25	32.2	22.6	0
1994-08-28	27.95	33.3	22.4	0
1994-08-29	27.025	32.4	21.9	0
1994-08-30	26.95	33.8	22.4	0
1994-08-31	27.5	32.8	22.5	0
1994-09-01	26.4	31.4	22.1	0
1994-09-02	26.625	30.6	21.6	0
1994-09-03	26.325	31.6	21.8	0
1994-09-04	26.775	32.4	22	0
1994-09-05	27.475	33.9	23	0
1994-09-06	27	34.2	22.8	0
1994-09-07	27.05	33	22.8	0
1994-09-08	27.775	33.6	22.4	0
1994-09-09	27.05	31.8	23.5	0
1994-09-10	27.225	31.6	22.1	1
1994-09-11	26.7	32.4	22.4	0
1994-09-12	26.575	31.5	21.7	0
1994-09-13	26.65	32.6	23	0
1994-09-14	26.75	32	23	0
1994-09-15	27.325	32.2	23	0
1994-09-16	27.75	32.2	23.8	0
1994-09-17	27.775	32.8	22.3	2
1994-09-18	24.875	30	22.8	1
1994-09-19	27.625	33.2	22.7	0
1994-09-20	26.95	32.4	23.8	0
1994-09-21	27.725	32.8	22.8	0
1994-09-22	27.425	32	23.1	0
1994-09-23	28.1	32.8	23.8	5
1994-09-24	26.65	30.8	22.4	0
1994-09-25	27.475	32.6	23	0
1994-09-26	27.3	32.4	22.5	0
1994-09-27	26.25	32.4	23.9	0
1994-09-28	27.15	31.8	22.4	0
1994-09-29	27.975	32.6	23	0
1994-09-30	27.275	32	23.6	0
1994-10-01	27.425	32.4	22.9	0
1994-10-02	26.7	31.8	23	0
1994-10-03	26.9	32.4	22.9	0
1994-10-04	25.9	31.4	23	7
1994-10-05	26.5	30.5	22.4	6
1994-10-06	27	32	23	0
1994-10-07	26.525	31.6	22.6	0
1994-10-08	26.175	32.7	22	5
1994-10-09	26.1	32.1	21.6	0
1994-10-10	26.475	33	23	0
1994-10-11	27.65	32.4	23	9
1994-10-12	24.7	27.8	21.2	0
1994-10-13	27	33.6	21.9	0
1994-10-14	27.5	33.6	21.6	0
1994-10-15	26.75	33.2	21.8	0
1994-10-16	25.375	32	21.6	4
1994-10-17	26.45	33.2	22.7	1
1994-10-18	26.95	32.2	23	0
1994-10-19	27.65	33	23	0
1994-10-20	27.65	33.6	21.5	0
1994-10-21	27.075	32.4	22.9	0
1994-10-22	27.025	32.4	23	0
1994-10-23	27.7	32.1	22.5	0
1994-10-24	27.85	32.4	23	0
1994-10-25	26.85	31.4	23.6	0
1994-10-26	26.95	30.4	22.8	10
1994-10-27	25.775	30.4	22.8	4
1994-10-28	27.75	32.6	23	0
1994-10-29	26.825	30.1	23.8	0
1994-10-30	25.9	32	22.1	0
1994-10-31	25.4	32.8	21.7	46
1994-11-01	25.7	32.2	22.4	14
1994-11-02	25.75	31.7	22.6	5
1994-11-03	25.75	31.2	23	3
1994-11-04	26.875	31.5	20.7	0
1994-11-05	25.35	32.2	22.7	33
1994-11-06	25.425	31.2	23.1	34
1994-11-07	26.125	31.6	21.8	0
1994-11-08	25.625	31.2	22.5	21
1994-11-09	26.175	31.6	23.1	3
1994-11-10	25.35	32.2	23.2	35
1994-11-11	25.625	32	23.5	52
1994-11-12	26.7	31.8	23.2	5
1994-11-13	27.2	32	23.5	0
1994-11-14	26.1	31.8	22.7	86
1994-11-15	26.125	32.8	23	5
1994-11-16	26.325	31.8	23.2	0
1994-11-17	26.15	31.4	23	2
1994-11-18	26.525	31.2	22.1	2
1994-11-19	26.95	32	22.7	0
1994-11-20	26.2	29.6	22.8	69
1994-11-21	25.3	31.2	22	11
1994-11-22	25.375	31.6	23.1	18
1994-11-23	26.55	32.6	23.5	5
1994-11-24	26.45	32.4	23.2	4
1994-11-25	24.3	30.3	22.8	8
1994-11-26	26	31.4	22.5	3
1994-11-27	26.95	32.4	23.4	8
1994-11-28	27.375	33.3	22.1	48
1994-11-29	24.45	33	23	11
1994-11-30	26.9	33	23.6	1
1994-12-01	26.35	32.6	22.8	1
1994-12-02	26.6	30.2	23.5	1
1994-12-03	27.65	32	22.3	24
1994-12-04	23.8	29.4	22	58
1994-12-05	26.25	30.8	22	0
1994-12-06	26.575	30.6	23	0
1994-12-07	26.95	32.7	23.5	0
1994-12-08	27.35	31.8	21.2	31
1994-12-09	26	31.8	23	1
1994-12-10	27.3	32.6	22.2	5
1994-12-11	27.025	31.8	23	3
1994-12-12	24.875	28.3	23	1
1994-12-13	27.025	31.6	23	30
1994-12-14	26.275	31	22.4	10
1994-12-15	26.45	32	23.2	0
1994-12-16	27.225	32.2	23.3	0
1994-12-17	26.6	30.2	23.4	0
1994-12-18	24.65	28	22.6	11
1994-12-19	25.5	30.4	23	5
1994-12-20	26	30.3	22.8	2
1994-12-21	25.875	31.4	22.8	0
1994-12-22	27.65	33	23	5
1994-12-23	26.2	29.4	23	4
1994-12-24	27.6	31.6	22.4	0
1994-12-25	26.525	32.2	22.5	0
1994-12-26	27.2	33.2	23.2	0
1994-12-27	26.675	31.2	23.2	9
1994-12-28	25.9	33	23	7
1994-12-29	25.05	30	23.4	12
1994-12-30	26.575	30.2	23.6	0
1994-12-31	25.125	30.5	23.1	19
1995-01-01	26.55	30.4	23.1	0
1995-01-02	25.3	30.4	23.4	10
1995-01-03	26.35	30.3	24	2
1995-01-04	26.7	30.6	24	0
1995-01-05	25.2	30.6	23.4	8
1995-01-06	25.475	30.4	23.2	38
1995-01-07	24.2	24.8	23.1	20
1995-01-08	25.075	27.8	22.8	3
1995-01-09	25.775	30.8	23	5
1995-01-10	26.55	30.6	23	0
1995-01-11	26.175	31	22.8	4
1995-01-12	25.35	30.8	23	2
1995-01-13	25.65	30.4	22.4	43
1995-01-14	25.95	30.4	22.6	0
1995-01-15	25.875	29.4	23.4	2
1995-01-16	26.525	30.6	22.8	3
1995-01-17	25.875	30.4	22.2	0
1995-01-18	25.9	31.2	22.2	0
1995-01-19	26.05	32	22.6	1
1995-01-20	26.3	29.8	23.6	12
1995-01-21	25.6	29.4	23.2	4
1995-01-22	25.15	29.4	NA	4
1995-01-23	24.875	30	22	0
1995-01-24	26.55	30.6	23.6	1
1995-01-25	27.6	33	22.4	21
1995-01-26	25.15	30	22.6	3
1995-01-27	25.925	30.6	22.5	10
1995-01-28	26.25	30.8	22.7	3
1995-01-29	25.125	27.4	21.8	4
1995-01-30	25.675	32.1	22.4	4
1995-01-31	24.625	29.8	23.4	14
1995-02-01	24.4	27.8	23.4	99
1995-02-02	23.95	26.8	22.8	63
1995-02-03	23.875	26.2	22.2	34
1995-02-04	24.05	26.2	22.1	15
1995-02-05	24.775	27.4	22.4	1
1995-02-06	25.3	29.2	23	5
1995-02-07	25.5	29.8	21.8	4
1995-02-08	27.025	31.6	23.8	0
1995-02-09	27.35	31.8	23.6	0
1995-02-10	26.65	31.8	22.8	0
1995-02-11	25.8	31	22.4	5
1995-02-12	27.025	31.4	22.6	0
1995-02-13	26.55	31.2	23.4	0
1995-02-14	27.5	32.2	23.2	23
1995-02-15	26	31.4	22.8	0
1995-02-16	26.3	32	23.6	12
1995-02-17	25.65	29.8	21.8	0
1995-02-18	26.2	30.4	23	0
1995-02-19	26.35	31	22.2	0
1995-02-20	25.35	30	22.8	0
1995-02-21	26.4	31	22.3	32
1995-02-22	26.125	30	21.7	12
1995-02-23	25.025	31.2	23.3	0
1995-02-24	26.4	30.4	22.8	0
1995-02-25	26.3	29.4	22	0
1995-02-26	26.75	32.6	23.2	0
1995-02-27	27.1	32.4	23.2	24
1995-02-28	24.55	32.2	21.8	3
1995-03-01	26.25	31	23.2	0
1995-03-02	25.5	30	23	16
1995-03-03	26.05	31	23.4	6
1995-03-04	27.2	32.8	22.4	13
1995-03-05	26.35	30.3	22.8	14
1995-03-06	25.45	31	22.6	19
1995-03-07	25.75	32.5	23.1	0
1995-03-08	26.325	30.4	23.8	21
1995-03-09	26.775	32.6	23.5	0
1995-03-10	27.2	32.6	23.2	12
1995-03-11	25.85	30.4	23	7
1995-03-12	25.475	28.8	22.8	34
1995-03-13	26.6	32	23	0
1995-03-14	26.9	33	22.4	0
1995-03-15	26.95	32.8	24.2	0
1995-03-16	26.75	31.8	24.4	52
1995-03-17	26	31.8	22.5	0
1995-03-18	26.3	32	22.4	3
1995-03-19	25.45	28.6	22.7	0
1995-03-20	26.725	31.8	23	8
1995-03-21	26.7	32.2	23	0
1995-03-22	27.1	33.4	22.4	68
1995-03-23	26.2	33	22.7	0
1995-03-24	26.95	32.8	24	7
1995-03-25	26.45	31.4	23.1	3
1995-03-26	26.5	32	23.3	19
1995-03-27	25.575	30.4	22.2	0
1995-03-28	27	34	22.8	3
1995-03-29	26.3	32.4	23.4	0
1995-03-30	27.025	32.2	23.7	0
1995-03-31	27.875	32.2	23.9	0
1995-04-01	26.85	32.4	22.9	3
1995-04-02	26.325	32	23.2	8
1995-04-03	26.55	31.2	23.6	8
1995-04-04	26.45	32.8	22.6	5
1995-04-05	26.95	32	23	0
1995-04-06	27.3	32	23.2	0
1995-04-07	26.7	31.2	23	1
1995-04-08	27.5	33	23	0
1995-04-09	26.6	32.6	24	2
1995-04-10	26.75	31	23.7	0
1995-04-11	26.3	33.4	23.2	41
1995-04-12	25.95	30.3	23	0
1995-04-13	26.2	33.2	23.4	57
1995-04-14	25.4	29.2	23	1
1995-04-15	26.85	33.4	23	0
1995-04-16	26.45	32.6	23	9
1995-04-17	27	33.6	22.8	0
1995-04-18	26.1	33.2	23.9	6
1995-04-19	26.15	33	23.8	0
1995-04-20	27.175	32.1	24	0
1995-04-21	24.85	29.6	23	10
1995-04-22	26.9	32.7	23	3
1995-04-23	27	32.2	23.2	0
1995-04-24	27.85	33.8	23.2	25
1995-04-25	25.475	30.4	23.2	3
1995-04-26	27.5	33.8	22.9	0
1995-04-27	28.2	33.2	23.6	2
1995-04-28	28.25	33.4	23	0
1995-04-29	28	34.2	22.3	0
1995-04-30	27.8	32	25	0
1995-05-01	26.9	33.2	23.9	0
1995-05-02	27.575	32.6	23.8	0
1995-05-03	27.475	33	24	31
1995-05-04	27	32.2	23	8
1995-05-05	27.55	31.6	24	0
1995-05-06	26.25	30.8	23.4	9
1995-05-07	27.4	32.8	24.6	8
1995-05-08	26.95	31.8	24.5	0
1995-05-09	26.725	31.6	24.6	0
1995-05-10	27.55	31.8	24	38
1995-05-11	26.2	29	23.2	0
1995-05-12	28.4	33.8	23	0
1995-05-13	28.65	34	24.6	0
1995-05-14	27.075	33	22.2	24
1995-05-15	27.6	32	22.4	0
1995-05-16	28.625	34.2	24.3	0
1995-05-17	27.7	34	24	0
1995-05-18	26.625	32	24	7
1995-05-19	26.2	32	23.4	0
1995-05-20	27.65	34	23	10
1995-05-21	24.9	31	23.4	3
1995-05-22	27	33	22.8	11
1995-05-23	26.575	34	23.9	41
1995-05-24	27.475	32.7	23	0
1995-05-25	27.875	33.2	23.2	0
1995-05-26	27.25	33	24	0
1995-05-27	27.7	33.1	24	0
1995-05-28	27.45	32.6	24	0
1995-05-29	27.7	32.8	23.9	0
1995-05-30	27.45	32.6	24.1	0
1995-05-31	27.05	33	23.2	0
1995-06-01	26.425	32.4	23.4	0
1995-06-02	28.15	33.8	23	0
1995-06-03	27.75	33.4	23.2	0
1995-06-04	27.25	32.2	24.2	10
1995-06-05	27.2	32.8	23.1	0
1995-06-06	27.925	34	23.7	3
1995-06-07	26.425	30.4	23.6	0
1995-06-08	27.6	33.4	23.6	0
1995-06-09	28.6	33.8	23	0
1995-06-10	27.325	33.7	24.1	5
1995-06-11	27.075	31.9	23.4	0
1995-06-12	27.5	34.4	23.4	6
1995-06-13	27.45	34.4	23.8	25
1995-06-14	27.225	33.8	22	8
1995-06-15	26.95	31.2	22.6	0
1995-06-16	28.05	33.2	23	0
1995-06-17	28.55	34	23.7	0
1995-06-18	25.825	29.2	24.2	0
1995-06-19	26.5	32.2	23.2	0
1995-06-20	26.8	33	24.5	1
1995-06-21	26.775	33	22.3	0
1995-06-22	27.45	32.4	23.6	0
1995-06-23	28.05	33	23.4	18
1995-06-24	27.45	33.4	21.8	0
1995-06-25	27.375	32.4	23	0
1995-06-26	27.65	33.6	22.8	0
1995-06-27	28.2	33.4	23.8	0
1995-06-28	27.15	31.8	24	38
1995-06-29	26.975	31.6	23.4	0
1995-06-30	27.45	32.4	23	0
1995-07-01	25.65	30	24	0
1995-07-02	25.7	29	23.2	0
1995-07-03	26.45	33	22.6	0
1995-07-04	26.7	33.2	23.2	4
1995-07-05	25.7	29.5	23.2	0
1995-07-06	24.8	32.6	22.8	0
1995-07-07	28.15	33.4	23	0
1995-07-08	28.125	33.4	23	0
1995-07-09	28.575	34	23.9	0
1995-07-10	28.725	34	24	0
1995-07-11	28.3	34	24.2	1
1995-07-12	27.45	33.8	22.8	0
1995-07-13	26.65	33.4	23	3
1995-07-14	27.4	33	22.3	0
1995-07-15	27.85	33	23.1	0
1995-07-16	26.575	33	23.4	0
1995-07-17	28	33.4	23	0
1995-07-18	27.575	32.6	23.1	55
1995-07-19	23.25	26.4	21.6	10
1995-07-20	25.575	31.8	22.4	0
1995-07-21	26.6	33	22.4	0
1995-07-22	26.275	33	22	0
1995-07-23	27.45	32.9	23.5	0
1995-07-24	27.25	33.4	23.2	9
1995-07-25	26.475	33.4	22.9	5
1995-07-26	24.3	28.4	22.7	10
1995-07-27	24.4	30.4	22	2
1995-07-28	27.15	32.6	21.7	0
1995-07-29	26.9	33	23	0
1995-07-30	26.325	33.1	22	0
1995-07-31	25.4	31.4	20.8	0
1995-08-01	24.15	31	23	1
1995-08-02	25.75	31.2	23.2	8
1995-08-03	26.225	32.8	22.8	8
1995-08-04	26.725	31.4	23	3
1995-08-05	27.1	33	23	3
1995-08-06	26.375	31	23.4	0
1995-08-07	25.45	29.2	22.6	0
1995-08-08	26.175	31.6	22.8	2
1995-08-09	25.9	32.2	22.8	5
1995-08-10	25.65	30.8	22.9	10
1995-08-11	26.4	33	23.2	0
1995-08-12	26.95	32.4	23.6	0
1995-08-13	26.475	31.2	23.4	9
1995-08-14	27.05	32	24	0
1995-08-15	26.15	31.8	22.6	20
1995-08-16	25.3	31.8	22.3	10
1995-08-17	26.4	32.4	22.6	0
1995-08-18	27.375	33.2	22.2	0
1995-08-19	28.025	33.4	22.4	0
1995-08-20	27.4	32.1	23.6	0
1995-08-21	27.3	31.8	24	0
1995-08-22	27.25	32.5	23.8	2
1995-08-23	27.25	33.2	23.2	0
1995-08-24	27.3	32.8	23.5	0
1995-08-25	27.025	32.5	22.6	0
1995-08-26	28.1	32.2	22.6	1
1995-08-27	26.625	33	22.6	0
1995-08-28	27.5	33.4	23.2	0
1995-08-29	27	32.8	21.7	0
1995-08-30	27.625	33.6	22.5	0
1995-08-31	27.7	33.6	22.3	0
1995-09-01	27.5	31.8	23.4	24
1995-09-02	27.1	32.5	22.2	3
1995-09-03	25.85	32	22	0
1995-09-04	27.85	34.8	23	5
1995-09-05	25.125	29	22.5	14
1995-09-06	25.5	27.8	22.6	0
1995-09-07	26.475	33.4	23.2	9
1995-09-08	25.75	29.9	23	0
1995-09-09	26.025	31.6	22.3	0
1995-09-10	26.9	32.7	22.2	0
1995-09-11	27.2	33.2	22.4	0
1995-09-12	27.1	33	22.4	0
1995-09-13	27.525	33.2	22.6	10
1995-09-14	27.2	33	23.2	0
1995-09-15	27.2	31.8	22.3	0
1995-09-16	26.625	32	22.1	0
1995-09-17	26.075	32.3	21.6	0
1995-09-18	27	33.2	21.8	0
1995-09-19	27.6	33.4	23	0
1995-09-20	28.15	33.6	22.8	0
1995-09-21	28.3	34.4	22.7	0
1995-09-22	28.1	34.2	23	0
1995-09-23	27.825	33.7	23	20
1995-09-24	23.97	26.8	22.8	23
1995-09-25	26.95	32	23.8	0
1995-09-26	25.8	28.6	24	0
1995-09-27	26.85	32.2	22.6	0
1995-09-28	27.725	33.2	23.1	5
1995-09-29	27.175	32.9	23	0
1995-09-30	25.95	32.3	22.9	3
1995-10-01	26.575	32.4	22.6	0
1995-10-02	27.9	34.4	22.8	0
1995-10-03	27.55	34.4	23.8	0
1995-10-04	28.15	33.8	23.8	0
1995-10-05	27.95	33.8	23.4	0
1995-10-06	26.075	30.4	22.6	11
1995-10-07	27.8	33.8	23.6	47
1995-10-08	25.95	32.6	21.4	5
1995-10-09	26.15	32.6	22.7	3
1995-10-10	26.3	33	23.2	0
1995-10-11	27.25	33.2	22.8	0
1995-10-12	26.15	30.4	23.2	3
1995-10-13	24.625	31	23	16
1995-10-14	26.725	32.7	22	0
1995-10-15	26.65	33.2	22	0
1995-10-16	26.3	31.2	23.6	1
1995-10-17	26.225	30.2	24	0
1995-10-18	27.6	34	22.4	0
1995-10-19	27.275	33	23.5	0
1995-10-20	27.35	33	23	0
1995-10-21	26.675	31.8	22	22
1995-10-22	25.7	31.4	22	0
1995-10-23	26.5	32	23	1
1995-10-24	26.85	31.8	22.6	3
1995-10-25	25.75	31.4	22.6	9
1995-10-26	27.275	32.6	23.2	0
1995-10-27	25.6	30.2	22.1	10
1995-10-28	25.4	31.2	23.4	7
1995-10-29	27.875	34.2	23.2	105
1995-10-30	25.9	30.4	23.2	6
1995-10-31	27.325	33.2	22.8	9
1995-11-01	27.7	34.2	22.8	0
1995-11-02	25.875	32	24.1	7
1995-11-03	27.6	33	22.7	0
1995-11-04	27.2	32.3	23	0
1995-11-05	27.6	34.4	23	46
1995-11-06	26.525	31.2	23.4	3
1995-11-07	26.35	32.2	24	52
1995-11-08	26.6	31.4	23	0
1995-11-09	26.975	32.4	24.2	0
1995-11-10	26.7	32	23.8	6
1995-11-11	26.05	31.4	23	0
1995-11-12	26.625	32.2	23.2	0
1995-11-13	27.15	33	23.4	68
1995-11-14	25.275	29	22.4	7
1995-11-15	25.75	31	22.8	7
1995-11-16	25.675	30.8	23.5	62
1995-11-17	26.8	32	22	0
1995-11-18	27	30.8	22.4	0
1995-11-19	26.15	31.2	23	0
1995-11-20	26.9	32	24.2	0
1995-11-21	28.35	33.8	24.2	0
1995-11-22	26.25	29.6	23.2	0
1995-11-23	26.9	30.4	24.4	17
1995-11-24	25.7	29.5	23	0
1995-11-25	26.6	31	23.2	0
1995-11-26	26.575	31	24	8
1995-11-27	26.4	31.6	22.8	0
1995-11-28	26.65	31.6	24.6	7
1995-11-29	26.75	31.6	23.4	1
1995-11-30	27.1	32.4	23.5	0
1995-12-01	28.5	32.8	23.2	0
1995-12-02	27	34	23.4	34
1995-12-03	27.45	32.8	23	30
1995-12-04	25.825	31.4	23.4	5
1995-12-05	26.6	31	23.2	0
1995-12-06	25.9	31.2	23.8	8
1995-12-07	26.725	NA	23.4	26
1995-12-08	26.6	31.4	23	4
1995-12-09	25.575	31.2	22.4	8
1995-12-10	26.05	30.2	22.8	0
1995-12-11	26.9	32.2	23.7	1
1995-12-12	26.95	32.2	24	23
1995-12-13	26.55	29.2	23.6	28
1995-12-14	26.225	30.6	22.5	25
1995-12-15	24.225	30.6	21.3	2
1995-12-16	26.65	32	21	1
1995-12-17	25.25	30.4	23	0
1995-12-18	26.15	30.4	23.5	10
1995-12-19	26.625	31	23.4	0
1995-12-20	26.45	31	23.4	0
1995-12-21	26.3	30.4	22.6	13
1995-12-22	26.225	31	21.7	0
1995-12-23	26.6	31	20.5	0
1995-12-24	26.9	32	23.2	0
1995-12-25	26.95	30	23.6	0
1995-12-26	26.45	30.6	23.6	2
1995-12-27	26.45	32.1	23.2	0
1995-12-28	26.975	33	23.8	0
1995-12-29	26.575	32.8	23.2	0
1995-12-30	25.475	28.8	22.5	0
1995-12-31	25.6	29	23.4	0
1996-01-01	24.8	26.4	23.8	3
1996-01-02	24.95	28	23.4	1
1996-01-03	25.2	27.8	23	0
1996-01-04	25.3	29	22.3	1
1996-01-05	25.375	29.4	22.4	0
1996-01-06	25.9	28.8	22	0
1996-01-07	26.25	31	23.4	0
1996-01-08	25.65	30.4	22.8	0
1996-01-09	26.275	31	23	0
1996-01-10	26.1	29.6	22.8	1
1996-01-11	25.25	30.4	22.4	0
1996-01-12	26	30.4	22.6	9
1996-01-13	25.95	31.4	22.4	2
1996-01-14	25.8	31.8	21.8	0
1996-01-15	25.7	28.6	23.4	0
1996-01-16	26.45	31.2	22.8	0
1996-01-17	26.15	30	22.7	0
1996-01-18	26.575	32.6	22.1	0
1996-01-19	26.475	31.4	21.2	35
1996-01-20	25.6	31.1	20.8	9
1996-01-21	24.8	30	21.8	4
1996-01-22	26.15	31.8	22.2	0
1996-01-23	26.8	31.6	23.4	0
1996-01-24	26.6	31.2	23.4	8
1996-01-25	25.825	32	21.8	34
1996-01-26	26.1	32.3	22	0
1996-01-27	26.775	31.8	22	0
1996-01-28	26.85	30.2	23.2	0
1996-01-29	27.1	32	23.8	2
1996-01-30	26.75	31	23	0
1996-01-31	25.85	30	23	0
1996-02-01	26.6	30.6	23.2	14
1996-02-02	25.325	29	23.4	46
1996-02-03	24.75	28	23.2	19
1996-02-04	25.05	27.8	23.2	0
1996-02-05	25.45	29.4	23.4	31
1996-02-06	24.4	29.6	22.4	12
1996-02-07	25.25	27.2	23	4
1996-02-08	25.45	28.6	23.3	1
1996-02-09	25.325	28.4	23	11
1996-02-10	26.075	30	23.2	1
1996-02-11	25.375	29.4	22.2	0
1996-02-12	25.9	31	23.2	5
1996-02-13	26.225	30.4	23.4	19
1996-02-14	26.5	30.6	23	0
1996-02-15	26.3	32.4	23.4	11
1996-02-16	26.325	31	22	0
1996-02-17	26.55	31	22.4	0
1996-02-18	26.65	32.5	23.2	0
1996-02-19	25.45	31.2	23.1	0
1996-02-20	26.95	31.2	23.8	0
1996-02-21	24.025	25.8	23.3	35
1996-02-22	24.15	26	23.1	56
1996-02-23	24.2	26.4	23	11
1996-02-24	25.3	28.4	22.8	0
1996-02-25	25.675	30.8	22.8	0
1996-02-26	26.25	31	22	0
1996-02-27	26.7	31.2	23.2	0
1996-02-28	26.3	30	23	0
1996-02-29	26.6	31	23	0
1996-03-01	26.225	31.2	22	0
1996-03-02	26.3	31	22	0
1996-03-03	26.85	30.8	23	0
1996-03-04	26.65	31	23.4	0
1996-03-05	26	31	22	0
1996-03-06	26.8	32	22.8	0
1996-03-07	26.15	30.2	23	0
1996-03-08	25.975	31.4	22.3	0
1996-03-09	26.775	32	22.2	0
1996-03-10	26.225	31	22.6	0
1996-03-11	26.9	30	24.2	0
1996-03-12	27.025	32.6	23	0
1996-03-13	26.875	32.6	22	0
1996-03-14	26.95	33	23	0
1996-03-15	27.65	33.8	22	0
1996-03-16	26.375	33.4	22	0
1996-03-17	25.85	32.2	23	16
1996-03-18	26.8	34.4	23.5	5
1996-03-19	26.175	34	22.6	0
1996-03-20	26.95	33.2	22.8	0
1996-03-21	26.5	31.4	23.7	0
1996-03-22	27.075	32.6	23	0
1996-03-23	26.75	32.7	23.2	0
1996-03-24	26.7	32.6	23	1
1996-03-25	26.55	32.4	24	8
1996-03-26	26.45	31.6	23.6	0
1996-03-27	25.85	31.4	22.6	0
1996-03-28	25.85	31.6	23.9	1
1996-03-29	27.6	33.2	22.6	27
1996-03-30	26.55	31	22.8	0
1996-03-31	25.15	33.8	22.6	52
1996-04-01	26.2	31	24.6	54
1996-04-02	27.25	33.8	22.6	2
1996-04-03	26.15	31.6	22.8	25
1996-04-04	24.45	29.2	22	0
1996-04-05	26.375	32	22.4	3
1996-04-06	25.375	30	22	12
1996-04-07	27.25	33.1	23.6	55
1996-04-08	24.65	33	23.2	39
1996-04-09	26.85	33.5	22.2	0
1996-04-10	27.8	33.8	22.4	0
1996-04-11	27.025	32	24.5	0
1996-04-12	26.625	31.2	22.6	0
1996-04-13	26.65	32	22.3	0
1996-04-14	26.775	33	23.6	11
1996-04-15	26.55	30.8	24.2	11
1996-04-16	27.325	33.5	24.2	1
1996-04-17	26	32	22.5	6
1996-04-18	26	32.4	23	0
1996-04-19	25.325	31.4	23.2	0
1996-04-20	27.4	32	22.9	33
1996-04-21	26.8	33	23	18
1996-04-22	25.15	30.8	23.6	48
1996-04-23	26.925	31.6	23.4	24
1996-04-24	26.7	31.8	23	52
1996-04-25	28.1	33.2	24	2
1996-04-26	26	31.5	22.8	2
1996-04-27	27.35	33	22.7	1
1996-04-28	26.5	32.2	22.8	27
1996-04-29	26.2	32.4	24.2	4
1996-04-30	27.45	32.4	23.8	0
1996-05-01	27.05	32.2	23.6	0
1996-05-02	27.25	32.4	23.2	0
1996-05-03	27.475	33.2	23	0
1996-05-04	27.6	33	23.6	1
1996-05-05	28.525	34.2	24	0
1996-05-06	27.95	34	25.2	0
1996-05-07	27.75	33.9	24.2	1
1996-05-08	28.5	33.2	24	0
1996-05-09	28.3	33.8	24.3	0
1996-05-10	27.65	32.8	24	0
1996-05-11	25.175	28	23.8	3
1996-05-12	26.225	33	21.8	0
1996-05-13	25.3	28.4	24.8	35
1996-05-14	27.275	32.8	23.2	0
1996-05-15	27.475	31.4	23.6	0
1996-05-16	27.975	33.6	24	0
1996-05-17	28.1	32.6	24	0
1996-05-18	28.2	33.7	24.1	0
1996-05-19	28.475	34	23.8	0
1996-05-20	28.4	34	24.8	0
1996-05-21	26.425	32.4	23.7	2
1996-05-22	26.65	30	23.2	0
1996-05-23	26.2	32.4	22.1	0
1996-05-24	26.2	31.6	23	0
1996-05-25	27.15	33.7	22	0
1996-05-26	27.875	34.2	23	0
1996-05-27	27.1	33.6	24.2	0
1996-05-28	26.175	33.6	22.8	0
1996-05-29	26.85	32.2	22.7	0
1996-05-30	27.75	33.8	23.3	3
1996-05-31	27.6	33.6	23	0
1996-06-01	27.85	33.7	22.8	1
1996-06-02	26.625	32.8	23.8	3
1996-06-03	26.75	33.4	23.9	1
1996-06-04	26.675	33.4	23.6	0
1996-06-05	26.15	32	23	0
1996-06-06	26.65	32.6	23	8
1996-06-07	26.525	32	23	0
1996-06-08	26.65	32	23.6	73
1996-06-09	24.4	27.3	22.8	9
1996-06-10	26.55	32.8	23.2	0
1996-06-11	26.5	32.8	23.2	0
1996-06-12	27.45	32.8	23	0
1996-06-13	27.225	33	24.2	0
1996-06-14	24.675	32.2	23	13
1996-06-15	26.575	33	22.2	0
1996-06-16	27.3	33	22.6	1
1996-06-17	26.9	33	24.8	5
1996-06-18	25.275	32.4	22	0
1996-06-19	27.35	33	22.7	0
1996-06-20	27.825	32.8	23.9	0
1996-06-21	27.8	33.1	23	0
[truncated: 7,498 more rows]

## Sheet: Average
		1991				1992				1993				1994
	Tmean	Tmax	Tmin	Prec	Tmean	Tmax	Tmin	Prec	Tmean	Tmax	Tmin	Prec	Tmean	Tmax	Tmin	Prec				Tmean= mean of temperature
January	26.2266	30.5045	23.4032	3.83871	25.654	29.9871	22.6323	9.22581	25.5927	29.6	22.68	7.83871	25.9581	30.0097	22.8355	2.77419				Tmax= mean of maximum temperature
February	26.5223	31.4071	23.1536	2.32143	26.1888	31.1414	22.9586	6.31034	26.1491	31.0143	22.4357	4.32143	26.3598	31.2964	22.8107	6.17857				Tmin=mean of minimum temperature
March	26.3475	31.569	23.1032	11.8065	26.6105	31.9323	23.4387	6.03226	26.0774	30.9258	22.5677	11.5161	25.7758	30.4548	22.4774	7.45161				Prec=mean of precipitation
April	26.9883	32.2	23.5267	8.4	27.2358	33.0033	23.4767	6.26667	26.6833	32.2467	23.1367	7.36667	26.3217	31.1733	22.82	9.56667
May	26.6605	31.5226	23.7452	4.22581	27.2452	32.3484	23.5097	5.6129	26.6742	31.7097	23.0903	8.74194	26.9266	31.9452	23.1032	4.6129
June	27.3842	32.3633	23.6267	0.666667	27.3292	32.5467	23.35	1	27.1975	32.1567	23.1867	5.3	26.3767	31.1733	22.82	9.56667
July	26.9645	32.3119	22.5452	0.258065	26.2331	31.8516	22.6461	3.80645	26.4734	31.0839	22.5323	0.774194	26.4847	32.2484	21.9	0.935484
August	27.079	32.529	23.0226	3.96774	26.5629	31.8161	22.6065	3.67742	27.0702	32.6742	22.4839	0.612903	26.9952	33.0355	21.9161	0
September	27.1858	31.9367	22.9433	0.166667	26.0975	31.4413	22.3067	7.66667	26.8333	32.5667	22.07	1.1	27.0667	32.2533	22.77	0.3
October	26.6589	31.8774	22.7613	3.19355	26.4206	31.6968	22.729	10.8065	26.8177	32.1484	22.5968	6.35484	26.725	32.0484	22.5452	2.96774
November	25.6508	30.9167	22.7733	8.06667	26.1508	30.6133	22.63	6.86667	26.4725	31.2467	22.7533	6.66667	26.0558	31.8067	22.8	16.2
December	26.1891	30.229	22.4548	8.90323	25.746	29.9258	22.629	12.7419	26.4113	30.9806	22.6484	6.41935	26.3492	31.1613	22.8516	7.70968
		1995				1996				1997				1998
	Tmean	Tmax	Tmin	Prec	Tmean	Tmax	Tmin	Prec	Tmean	Tmax	Tmin	Prec	Tmean	Tmax	Tmin	Prec
January	25.7855	30.1871	22.9067	7.12903	25.979	30.4581	22.6032	3.51613	26.0016	30.6129	23.8419	3.25806	27.1968	32.5032	23.8419	4.87097
February	25.8661	30.2929	22.7143	11.8571	25.6931	29.6517	23.0069	9.51724	26.767	32.5929	22.6857	3.46429	27.3268	32.4964	23.8643	3.78571
March	26.4363	31.7161	23.0935	9.83871	26.5331	32.1	22.8516	3.54839	26.325	31.8516	22.9194	11.9032	27.6169	33.4097	23.7645	9.06452
April	26.7792	32.3167	23.2567	6.13333	26.5067	32.1067	23.1367	14.3333	26.5642	32.4433	22.91	6.06667	27.7583	33.6333	24.2133	3.03333
May	27.2427	32.5935	23.6581	6.12903	27.3105	32.7516	23.5484	1.45161	27.1911	32.8645	23.2581	5.29032	27.979	33.8677	24.4581	4.45161
June	27.37	32.8067	23.3267	3.8	26.865	32.6633	23.2367	4.13333	27.1075	33.0833	22.64	1.13333	27.5217	33.18	23.5333	6.26667
July	26.6363	32.2935	22.8387	3.19355	26.9242	32.2581	22.9581	2.54839	26.754	32.7161	22.2452	1.16129	NA	NA	NA	NA
August	26.7	32.2226	22.9484	2.64516	26.2024	31.4452	21.8469	7.58065	27.471	33.5742	22.7935	0.83871	26.6056	32.0484	23.1581	4.93548
September	26.8132	32.15	22.7167	3.86667	26.5975	32.1967	23.1267	6.06667	26.6581	125.264	23.0268	5.45802	26.9842	32.78	23.15	8.6
October	26.6903	32.3645	22.8871	8.32258	26.5815	32.3419	23.1161	8.06452	27.1097	32.2871	23.1323	0.419355	27.1024	32.6581	23.4129	11.871
November	26.6592	31.7	23.34	9.7	26.7408	32.3033	22.99	8.16667	27.01	32.77	23.25	3.66667	27.1492	32.18	23.21	8.06667
December	26.4097	31.21	22.9774	7.09677	26.5645	31.7387	22.9161	7.45161	26.8145	40.9145	22.973	3.87818	26.404	31.0452	23.0484	8.45161
		1999				2000				2001				2002
	Tmean	Tmax	Tmin	Prec	Tmean	Tmax	Tmin	Prec	Tmean	Tmax	Tmin	Prec	Tmean	Tmax	Tmin	Prec
January	26.375	30.7935	23.2516	9.96774	26.1145	30.1968	22.6129	5.54839	25.8581	30.3645	22.7742	5.48387	26.354	30.2258	23.2516	5.90323
February	26.7232	31.2714	23.0393	6.82143	26.2724	30.9552	22.6	7.17241	26.6	31.4429	22.2821	6.10714	26.3482	31.6143	22.9143	2.92857
March	26.5831	31.5452	23	7.29032	26.8024	31.8774	22.6806	9.3871	27.0952	32.8065	22.0733	6.45161	26.6411	31.7871	23.0548	6.6129
April	26.5604	31.2034	23.097	8.0265	26.7433	31.6767	22.8367	6.93333	26.8367	32.2333	23.2167	8.4	26.9525	32.46	22.97	4.8
May	26.9097	32.4294	23.1194	5.74194	27.3266	32.7161	23.3	4.67742	27.4411	32.1355	23.3968	4.70968	27.5435	32.5774	23.7323	8.06452
June	27.0825	32.45	22.7233	3.2	26.3883	31.5467	22.731	8.50572	26.78	31.7567	22.8867	7.6	27.2342	32.5967	23.0133	5.1
July	26.3685	32.0452	22.2323	5.7875	26.6153	32.2065	22.5774	9.90323	26.804	31.9032	22.5452	1.83871	26.8073	31.8419	23.0097	8.54839
August	26.8677	32.829	22.2871	1.41935	26.4185	32.1419	22.2968	2.19355	26.8234	31.6903	22.8742	7.67742	26.9661	32.4645	22.5871	1.03226
September	26.8375	32.7867	22.5567	3.53333	26.4733	32.6033	22.4	2.96667	26.9483	32.3333	22.6867	2.6	26.8408	32.3467	22.7867	1.9
October	26.2782	31.7839	22.8161	8.16129	26.6774	32.4613	22.7194	7.22581	26.646	31.4935	22.6968	10.8387	27.0677	33.029	22.6452	2.80645
November	26.5917	31.9333	22.8533	10.4667	26.9075	32.35	23.2267	7.73333	26.2592	31.5167	22.8867	12.4	26.5342	31.9567	22.62	6.6
December	26.6645	30.729	22.771	5.87097	26.7016	31.4419	23.0839	7.6129	26.5892	31.3129	22.9677	13.0968	26.6105	32.0935	23.2161	9.06452
		2003				2004				2005				2006
	Tmean	Tmax	Tmin	Prec	Tmean	Tmax	Tmin	Prec	Tmean	Tmax	Tmin	Prec	Tmean	Tmax	Tmin	Prec
January	26.3597	31.0742	23.0613	7.41935	26.4645	30.6806	22.3129	12.2258	26.2661	30.8419	22.7452	2.51613	26.0823	30.029	22.7	5.35484
February	26.4982	30.9714	23.025	11.0357	26.4534	31.0931	22.6724	6.06897	26.9357	32.225	22.6321	4.14286	26.6286	31.4429	22.6929	11.75
March	27.0282	31.9677	23.0548	5.6129	26.6121	31.7645	22.4097	11.8387	26.8073	31.8419	23.0097	8.54839	27.0831	32.1387	22.9129	8.83871
April	26.8008	32.2333	23.1833	7.33333	26.8533	32.26	22.7033	6.83333	27.0858	32.5967	23.0133	3.3	26.7367	31.7433	22.8033	8.63333
May	27.5887	32.8935	23.5742	2.48387	27.4113	32.8935	23.0871	5.16129	27.25	32.3839	23.2839	6.77419	26.8097	31.671	23.229	6.06452
June	27.2142	33.2767	22.52	0.0666667	27.0917	32.45	22.4767	1.56667	27.1917	32.0733	22.91	4.83333	26.6858	31.4267	22.9833	4.8
July	26.6452	32.3194	22.0742	2.54839	26.6452	32.3194	22.0742	2.54839	26.8355	31.6581	22.8774	4.64516	27.0855	32.2548	22.8935	3.12903
August	26.9387	32.0161	22.7767	7.16129	26.9016	32.5516	22.0742	0.419355	26.6806	31.6161	22.0581	5.77419	26.7669	32.1355	22.4484	4.6129
September	26.8175	32.3	22.75	6.3	26.8025	32.6	22.5433	2.26667	26.9892	32.2533	22.69	7.63333	26.9383	31.89	22.7767	3.93333
October	26.8444	32.1806	22.729	9.16129	26.7685	32.529	22.629	7	26.5927	31.6323	22.7419	7.67742	27.3718	32.4419	23.1645	1.70968
November	26.33	31.62	22.5833	4.6	26.3733	31.94	22.8367	8.26667	26.4075	31.1967	22.8	11.3333	26.59	32.1933	22.7533	5.16667
December	26.1387	30.1516	22.6806	11.2258	26.2516	30.6165	23	8.41935	26.5452	31.3419	22.8677	8.35484	26.5073	30.9258	23.371	5.58065
		2007				2008				2009				2010
	Tmean	Tmax	Tmin	Prec	Tmean	Tmax	Tmin	Prec	Tmean	Tmax	Tmin	Prec	Tmean	Tmax	Tmin	Prec
January	26.3081	30.5226	23.0613	6.80645	26.5556	30.8903	23.4226	6.06452	26.1565	30.1839	23.4452	3.87097	26.7653	31.1	23.6968	3.64516
February	26.2732	31.1179	22.8571	3.28571	26.4474	30.6207	23.231	3.41379	26.5321	30.8357	22.9143	12.25	27.0384	31.3786	24.1	10.3571
March	26.7944	31.4226	23.1613	7.54839	26.0685	30.7806	22.7452	10.7097	26.6315	31.9548	22.9935	6.19355	26.9935	31.7129	23.7452	6.64516
April	26.9442	32.0411	23.0867	9.76667	26.6483	31.6933	22.97	8.6	27.3767	32.5167	23.8367	6	27.7383	32.72	24.2067	7.33333
May	27.1895	32.0194	23.6323	7.06452	27.0024	31.9484	23.2	2.64516	27.6823	32.5267	23.9226	3.96774	28.0177	32.9516	24.5548	9.09677
June	27.145	31.8933	23.7767	3.46667	26.8192	31.8233	23.25	0.933333	27.3858	32.7167	23.37	3.93333	27.19	31.96	24.0567	5.56667
July	26.6121	31.1323	22.9194	6.77419	26.4435	31.2903	22.771	2.22581	26.8677	32.1548	22.99	1.90323	26.6645	31.2645	23.5065	12.6129
August	26.6903	31.7742	22.6032	6.35484	26.4492	31.8935	22.6258	7.96774	26.9702	32.0774	22.9194	5	26.9129	31.9774	23.4548	11.1935
September	26.5267	31.23	22.8633	2.86667	26.4058	31.7333	22.9533	3.56667	27.7017	32.8033	23.4	5.46667	26.7117	32.0533	23.3333	8.8
October	26.7871	31.7839	23.0032	7.67742	26.3895	31.6	23.1806	6.58065	26.8855	32.6194	23.4419	5.58065	26.9387	31.8032	23.5065	11.9677
November	26.5283	30.9467	23.4367	3.46667	26.8817	31.74	23.5767	10.1667	28.3408	31.7767	23.5633	11.5333	26.7525	31.4833	23.43	11.1667
December	26.1873	30.3839	22.8194	7.67742	26.4097	30.4774	23.6258	10.4839	26.3089	30.4387	23.7581	10.8387	26.8516	31.1323	23.5452	7.41935
		2011				2012				2013				2014
	Tmean	Tmax	Tmin	Prec	Tmean	Tmax	Tmin	Prec	Tmean	Tmax	Tmin	Prec	Tmean	Tmax	Tmin	Prec
January	26.1306	30.1042	23.0871	10.0323	27.246	31.8935	23.6839	4.37097	27.0992	31.6226	24.1323	4.84194	25.7081	29.5903	23.1419	2.96452
February	26.7937	31.4429	23.4786	6.25	26.613	31.6276	23.2345	4.48966	26.808	31.3607	23.8036	6.30714	26.9589	31.6054	23.6786	0.935714
March	26.5871	31.4935	23.2	7.25806	26.7847	31.9935	22.9323	7.17419	27.0952	32.171	23.6903	10.5161	27.075	32.3581	23.3065	3.25806
April	26.7492	31.4733	22.9267	9	26.6942	32.0333	23.21	8.14667	27.2317	32.53	23.8	4.17	26.7467	32.44	23.1733	11.27
May	27.4605	32.6613	24.0097	3.93548	27.1963	32.4048	23.1758	8.58387	27.0823	32.2097	23.9484	5.89677	27.179	32.4323	30.4323	3.5129
June	27.4358	32.34	23.8533	2.83333	27.2495	32.52	23.3233	1.75667	27.6667	32.96	23.4833	2.76667	27.2392	32.3367	23.8867	3.40333
July	27.2774	31.9097	23.0968	4.64516	26.3879	31.6677	23.0323	3.48387	26.1645	31.0516	22.6548	6.74516	27.275	32.0677	23.42	6.29355
August	27.4274	32.7032	23.4032	0.935484	26.9806	32.4484	22.9097	1.75806	26.504	31.771	22.6774	2.36774	26.4782	31.2516	23.12	5.95806
September	27.4692	33.0533	23.5033	1.2	27.565	32.7167	23.3	1.76	26.6033	31.7833	22.9467	7.84667	26.955	32.2933	23.1931	2.23333
October	26.4073	31.7032	23.2233	6.87097	26.8121	32.5226	23.4097	8.93226	26.6218	31.9742	23.3	10.4935	27.1177	32.3065	23.5839	3.24516
November	NA	NA	NA	NA	26.8792	31.9867	23.57	4.99667	26.6225	31.9733	23.2467	5.69	26.785	32.0333	23.6267	7.6
December	26.3298	30.1806	23.3097	5.83871	26.496	31.2774	23.5516	7.26452	26.175	30.8375	23.3467	14.4437	26.5823	31.0935	23.3226	8.19032
		2015				2016				2017				2018
	Tmean	Tmax	Tmin	Prec	Tmean	Tmax	Tmin	Prec	Tmean	Tmax	Tmin	Prec	Tmean	Tmax	Tmin	Prec
January	26.5274	30.6129	23.6097	5.1	26.9895	31.7645	24.0484	3.34839	27.1266	31.5	23.9	6.5	26.9766	31.5194	23.2032	8.4
February	26.2045	30.8393	23.4714	3.97857	26.8034	31.1069	23.7379	7.14828	26.4839	30.7607	23.6607	9.1	26.5312	30.925	23.3	10.5
March	26.5306	31.7484	23.2613	5.74516	27.3839	32.0548	24.0484	2.26129	26.7258	31.6871	23.4581	8.5	26.8597	31.6226	23.1645	12.8
April	26.9975	32.15	23.7367	10.1167	27.5792	33.0267	24.03	7.78667	26.9345	32.0931	23.6897	9.8	27.1825	31.9533	23.8033	NA
May	27.4718	32.3	24.1677	4.32903	27.7573	32.8194	24.3581	2.59032	27.2371	32.1839	23.8903	7.1	27.2984	32.1968	23.8387	13.8
June	27.3775	32.6433	23.74	1.15333	27.1958	32.1067	23.7133	2.53667	27.1861	32.15	23.7567	10.4	27.5483	32.2	23.6567	8.6
July	27.4637	32.9323	23.3548	2.35806	27.2548	32.8129	23.729	4.1	26.835	31.48	23.4733	3.2	27.5576	32.2548	23.3871	6.3
August	27.213	32.4419	23.0548	1.20645	27.2202	32.7774	23.5219	6.42903	26.9675	31.85	23.3967	3.6	27.4527	32.4677	23.3	7.5
September	27.4742	32.5167	23.4133	0	27.2583	32.48	23.3667	3.64667	27.1283	32.4333	23.6133	10.3	26.9275	32.0733	22.91	13.9
October	27.2395	32.2806	23.7903	1.16129	26.9839	32.1516	23.3645	4.2	27.1525	32.1733	23.6633	12.1	26.9524	32.1968	23.4452	6.6
November	26.77	32.51	23.7	11.5067	26.8283	31.5567	23.6267	6.98	27.2267	31.66	23.7467	18.8	26.8683	32.0533	23.4933	15.6
December	26.8573	31.2613	23.9065	9.64516	27.5667	31.8387	24.2161	4.51613	26.9347	31.371	23.6645	10.9	27.1673	32.0774	23.7	12.4
		2019				2020
	Tmean	Tmax	Tmin	Prec	Tmean	Tmax	Tmin	Prec
January	27.0548	31.4935	24.0355	9.2	27.1411	31.1806	24.3903	6.9
February	26.5116	31.1286	23.8	8.9	27.5974	31.9966	24.4517	7.2
March	27.4081	32.4774	23.5	8.1	27.8976	32.8839	24.2806	11.6
April	27.4867	32.5733	24.1133	6.1	27.6692	32.48	24.2967	9.7
May	27.6169	32.8581	24.2613	3.1	27.6952	32.0581	24.2774	9.9
June	27.2717	32.0333	24.0833	6.1	27.2033	31.89	24.0567	6.3
July	27.2952	32.6419	23.2097	1	26.7274	31.8	23.4935	13.2
August	27.6718	33.5226	22.8484	0.2	27.6185	32.9387	23.7387	13.7
September	27.8325	33.9233	23.0533	2.2	27.11	31.8967	23.6067	9.6
October	27.2774	32.3806	23.6323	6.8	27.2	32.1065	23.6774	18.4
November	27.265	32.5167	23.8433	5.1	27.2583	32.26	24.0867	13.2
December	26.9024	30.771	24.3065	1.8	NA	31.8806	24.1806	20.2

## Sheet: max temperature
Year	Month	Mean maximum temperature
1991	January	30.5045
1991	February	31.4071
1991	March	31.569
1991	April	32.2
1991	May	31.5226
1991	June	32.3633
1991	July	32.3119
1991	August	32.529
1991	September	31.9367
1991	October	31.8774
1991	November	30.9167
1991	December	30.229
1992	January	29.9871
1992	February	31.1414
1992	March	31.9323
1992	April	33.0033
1992	May	32.3484
1992	June	32.5467
1992	July	31.8516
1992	August	31.8161
1992	September	31.4413
1992	October	31.6968
1992	November	30.6133
1992	December	29.9258
1993	January	29.6
1993	February	31.0143
1993	March	30.9258
1993	April	32.2467
1993	May	31.7097
1993	June	32.1567
1993	July	31.0839
1993	August	32.6742
1993	September	32.5667
1993	October	32.1484
1993	November	31.2467
1993	December	30.9806
1994	January	30.0097
1994	February	31.2964
1994	March	30.4548
1994	April	31.1733
1994	May	31.9452
1994	June	31.1733
1994	July	32.2484
1994	August	33.0355
1994	September	32.2533
1994	October	32.0484
1994	November	31.8067
1994	December	31.1613
1995	January	30.1871
1995	February	30.2929
1995	March	31.7161
1995	April	32.3167
1995	May	32.5935
1995	June	32.8067
1995	July	32.2935
1995	August	32.2226
1995	September	32.15
1995	October	32.3645
1995	November	31.7
1995	December	31.21
1996	January	30.4581
1996	February	29.6517
1996	March	32.1
1996	April	32.1067
1996	May	32.7516
1996	June	32.6633
1996	July	32.2581
1996	August	31.4452
1996	September	32.1967
1996	October	32.3419
1996	November	32.3033
1996	December	31.7387
1997	January	30.6129
1997	February	32.5929
1997	March	31.8516
1997	April	32.4433
1997	May	32.8645
1997	June	33.0833
1997	July	32.7161
1997	August	33.5742
1997	September	#REF!
1997	October	32.2871
1997	November	32.77
1997	December	#REF!
1998	January	32.5032
1998	February	32.4964
1998	March	33.4097
1998	April	33.6333
1998	May	33.8677
1998	June	33.18
1998	July	NA
1998	August	32.0484
1998	September	32.78
1998	October	32.6581
1998	November	32.18
1998	December	31.0452
1999	January	30.7935
1999	February	31.2714
1999	March	31.5452
1999	April	31.2034
1999	May	32.4294
1999	June	32.45
1999	July	32.0452
1999	August	32.829
1999	September	32.7867
1999	October	31.7839
1999	November	31.9333
1999	December	30.729
2000	January	30.1968
2000	February	30.9552
2000	March	31.8774
2000	April	31.6767
2000	May	32.7161
2000	June	31.5467
2000	July	32.2065
2000	August	32.1419
2000	September	32.6033
2000	October	32.4613
2000	November	32.35
2000	December	31.4419
2001	January	30.3645
2001	February	31.4429
2001	March	32.8065
2001	April	32.2333
2001	May	32.1355
2001	June	31.7567
2001	July	31.9032
2001	August	31.6903
2001	September	32.3333
2001	October	31.4935
2001	November	31.5167
2001	December	31.3129
2002	January	30.2258
2002	February	31.6143
2002	March	31.7871
2002	April	32.46
2002	May	32.5774
2002	June	32.5967
2002	July	31.8419
2002	August	32.4645
2002	September	32.3467
2002	October	33.029
2002	November	31.9567
2002	December	32.0935
2003	January	31.0742
2003	February	30.9714
2003	March	31.9677
2003	April	32.2333
2003	May	32.8935
2003	June	33.2767
2003	July	32.3194
2003	August	32.0161
2003	September	32.3
2003	October	32.1806
2003	November	31.62
2003	December	30.1516
2004	January	30.6806
2004	February	31.0931
2004	March	31.7645
2004	April	32.26
2004	May	32.8935
2004	June	32.45
2004	July	32.3194
2004	August	32.5516
2004	September	32.6
2004	October	32.529
2004	November	31.94
2004	December	30.6165
2005	January	30.8419
2005	February	32.225
2005	March	31.8419
2005	April	32.5967
2005	May	32.3839
2005	June	32.0733
2005	July	31.6581
2005	August	31.6161
2005	September	32.2533
2005	October	31.6323
2005	November	31.1967
2005	December	31.3419
2006	January	30.029
2006	February	31.4429
2006	March	32.1387
2006	April	31.7433
2006	May	31.671
2006	June	31.4267
2006	July	32.2548
2006	August	32.1355
2006	September	31.89
2006	October	32.4419
2006	November	32.1933
2006	December	30.9258
2007	January	30.5226
2007	February	31.1179
2007	March	31.4226
2007	April	32.0411
2007	May	32.0194
2007	June	31.8933
2007	July	31.1323
2007	August	31.7742
2007	September	31.23
2007	October	31.7839
2007	November	30.9467
2007	December	30.3839
2008	January	30.8903
2008	February	30.6207
2008	March	30.7806
2008	April	31.6933
2008	May	31.9484
2008	June	31.8233
2008	July	31.2903
2008	August	31.8935
2008	September	31.7333
2008	October	31.6
2008	November	31.74
2008	December	30.4774
2009	January	30.1839
2009	February	30.8357
2009	March	31.9548
2009	April	32.5167
2009	May	32.5267
2009	June	32.7167
2009	July	32.1548
2009	August	32.0774
2009	September	32.8033
2009	October	32.6194
2009	November	31.7767
2009	December	30.4387
2010	January	31.1
2010	February	31.3786
2010	March	31.7129
2010	April	32.72
2010	May	32.9516
2010	June	31.96
2010	July	31.2645
2010	August	31.9774
2010	September	32.0533
2010	October	31.8032
2010	November	31.4833
2010	December	31.1323
2011	January	30.1042
2011	February	31.4429
2011	March	31.4935
2011	April	31.4733
2011	May	32.6613
2011	June	32.34
2011	July	31.9097
2011	August	32.7032
2011	September	33.0533
2011	October	31.7032
2011	November	NA
2011	December	30.1806
2012	January	31.8935
2012	February	31.6276
2012	March	31.9935
2012	April	32.0333
2012	May	32.4048
2012	June	32.52
2012	July	31.6677
2012	August	32.4484
2012	September	32.7167
2012	October	32.5226
2012	November	31.9867
2012	December	31.2774
2013	January	31.6226
2013	February	31.3607
2013	March	32.171
2013	April	32.53
2013	May	32.2097
2013	June	32.96
2013	July	31.0516
2013	August	31.771
2013	September	31.7833
2013	October	31.9742
2013	November	31.9733
2013	December	30.8375
2014	January	29.5903
2014	February	31.6054
2014	March	32.3581
2014	April	32.44
2014	May	32.4323
2014	June	32.3367
2014	July	32.0677
2014	August	31.2516
2014	September	32.2933
2014	October	32.3065
2014	November	32.0333
2014	December	31.0935
2015	January	30.6129
2015	February	30.8393
2015	March	31.7484
2015	April	32.15
2015	May	32.3
2015	June	32.6433
2015	July	32.9323
2015	August	32.4419
2015	September	32.5167
2015	October	32.2806
2015	November	32.51
2015	December	31.2613
2016	January	31.7645
2016	February	31.1069
2016	March	32.0548
2016	April	33.0267
2016	May	32.8194
2016	June	32.1067
2016	July	32.8129
2016	August	32.7774
2016	September	32.48
2016	October	32.1516
2016	November	31.5567
2016	December	31.8387
2017	January	31.5
2017	February	30.7607
2017	March	31.6871
2017	April	32.0931
2017	May	32.1839
2017	June	32.15
2017	July	31.48
2017	August	31.85
2017	September	32.4333
2017	October	32.1733
2017	November	31.66
2017	December	31.371
2018	January	31.5194
2018	February	30.925
2018	March	31.6226
2018	April	31.9533
2018	May	32.1968
2018	June	32.2
2018	July	32.2548
2018	August	32.4677
2018	September	32.0733
2018	October	32.1968
2018	November	32.0533
2018	December	32.0774
2019	January	31.4935
2019	February	31.1286
2019	March	32.4774
2019	April	32.5733
2019	May	32.8581
2019	June	32.0333
2019	July	32.6419
2019	August	33.5226
2019	September	33.9233
2019	October	32.3806
2019	November	32.5167
2019	December	30.771
2020	January	31.1806
2020	February	31.9966
2020	March	32.8839
2020	April	32.48
2020	May	32.0581
2020	June	31.89
2020	July	31.8
2020	August	32.9387
2020	September	31.8967
2020	October	32.1065
2020	November	32.26
2020	December	31.8806

## Sheet: min temperature
Year	Month	Mean minimum temperature (°C)
1991	January	23.4032
1991	February	23.1536
1991	March	23.1032
1991	April	23.5267
1991	May	23.7452
1991	June	23.6267
1991	July	22.5452
1991	August	23.0226
1991	September	22.9433
1991	October	22.7613
1991	November	22.7733
1991	December	22.4548
1992	January	22.6323
1992	February	22.9586
1992	March	23.4387
1992	April	23.4767
1992	May	23.5097
1992	June	23.35
1992	July	22.6461
1992	August	22.6065
1992	September	22.3067
1992	October	22.729
1992	November	22.63
1992	December	22.629
1993	January	22.68
1993	February	22.4357
1993	March	22.5677
1993	April	23.1367
1993	May	23.0903
1993	June	23.1867
1993	July	22.5323
1993	August	22.4839
1993	September	22.07
1993	October	22.5968
1993	November	22.7533
1993	December	22.6484
1994	January	22.8355
1994	February	22.8107
1994	March	22.4774
1994	April	22.82
1994	May	23.1032
1994	June	22.82
1994	July	21.9
1994	August	21.9161
1994	September	22.77
1994	October	22.5452
1994	November	22.8
1994	December	22.8516
1995	January	22.9067
1995	February	22.7143
1995	March	23.0935
1995	April	23.2567
1995	May	23.6581
1995	June	23.3267
1995	July	22.8387
1995	August	22.9484
1995	September	22.7167
1995	October	22.8871
1995	November	23.34
1995	December	22.9774
1996	January	22.6032
1996	February	23.0069
1996	March	22.8516
1996	April	23.1367
1996	May	23.5484
1996	June	23.2367
1996	July	22.9581
1996	August	21.8469
1996	September	23.1267
1996	October	23.1161
1996	November	22.99
1996	December	22.9161
1997	January	23.8419
1997	February	22.6857
1997	March	22.9194
1997	April	22.91
1997	May	23.2581
1997	June	22.64
1997	July	22.2452
1997	August	22.7935
1997	September	#REF!
1997	October	23.1323
1997	November	23.25
1997	December	#REF!
1998	January	23.8419
1998	February	23.8643
1998	March	23.7645
1998	April	24.2133
1998	May	24.4581
1998	June	23.5333
1998	July	NA
1998	August	23.1581
1998	September	23.15
1998	October	23.4129
1998	November	23.21
1998	December	23.0484
1999	January	23.2516
1999	February	23.0393
1999	March	23
1999	April	23.097
1999	May	23.1194
1999	June	22.7233
1999	July	22.2323
1999	August	22.2871
1999	September	22.5567
1999	October	22.8161
1999	November	22.8533
1999	December	22.771
2000	January	22.6129
2000	February	22.6
2000	March	22.6806
2000	April	22.8367
2000	May	23.3
2000	June	22.731
2000	July	22.5774
2000	August	22.2968
2000	September	22.4
2000	October	22.7194
2000	November	23.2267
2000	December	23.0839
2001	January	22.7742
2001	February	22.2821
2001	March	22.0733
2001	April	23.2167
2001	May	23.3968
2001	June	22.8867
2001	July	22.5452
2001	August	22.8742
2001	September	22.6867
2001	October	22.6968
2001	November	22.8867
2001	December	22.9677
2002	January	23.2516
2002	February	22.9143
2002	March	23.0548
2002	April	22.97
2002	May	23.7323
2002	June	23.0133
2002	July	23.0097
2002	August	22.5871
2002	September	22.7867
2002	October	22.6452
2002	November	22.62
2002	December	23.2161
2003	January	23.0613
2003	February	23.025
2003	March	23.0548
2003	April	23.1833
2003	May	23.5742
2003	June	22.52
2003	July	22.0742
2003	August	22.7767
2003	September	22.75
2003	October	22.729
2003	November	22.5833
2003	December	22.6806
2004	January	22.3129
2004	February	22.6724
2004	March	22.4097
2004	April	22.7033
2004	May	23.0871
2004	June	22.4767
2004	July	22.0742
2004	August	22.0742
2004	September	22.5433
2004	October	22.629
2004	November	22.8367
2004	December	23
2005	January	22.7452
2005	February	22.6321
2005	March	23.0097
2005	April	23.0133
2005	May	23.2839
2005	June	22.91
2005	July	22.8774
2005	August	22.0581
2005	September	22.69
2005	October	22.7419
2005	November	22.8
2005	December	22.8677
2006	January	22.7
2006	February	22.6929
2006	March	22.9129
2006	April	22.8033
2006	May	23.229
2006	June	22.9833
2006	July	22.8935
2006	August	22.4484
2006	September	22.7767
2006	October	23.1645
2006	November	22.7533
2006	December	23.371
2007	January	23.0613
2007	February	22.8571
2007	March	23.1613
2007	April	23.0867
2007	May	23.6323
2007	June	23.7767
2007	July	22.9194
2007	August	22.6032
2007	September	22.8633
2007	October	23.0032
2007	November	23.4367
2007	December	22.8194
2008	January	23.4226
2008	February	23.231
2008	March	22.7452
2008	April	22.97
2008	May	23.2
2008	June	23.25
2008	July	22.771
2008	August	22.6258
2008	September	22.9533
2008	October	23.1806
2008	November	23.5767
2008	December	23.6258
2009	January	23.4452
2009	February	22.9143
2009	March	22.9935
2009	April	23.8367
2009	May	23.9226
2009	June	23.37
2009	July	22.99
2009	August	22.9194
2009	September	23.4
2009	October	23.4419
2009	November	23.5633
2009	December	23.7581
2010	January	23.6968
2010	February	24.1
2010	March	23.7452
2010	April	24.2067
2010	May	24.5548
2010	June	24.0567
2010	July	23.5065
2010	August	23.4548
2010	September	23.3333
2010	October	23.5065
2010	November	23.43
2010	December	23.5452
2011	January	23.0871
2011	February	23.4786
2011	March	23.2
2011	April	22.9267
2011	May	24.0097
2011	June	23.8533
2011	July	23.0968
2011	August	23.4032
2011	September	23.5033
2011	October	23.2233
2011	November	NA
2011	December	23.3097
2012	January	23.6839
2012	February	23.2345
2012	March	22.9323
2012	April	23.21
2012	May	23.1758
2012	June	23.3233
2012	July	23.0323
2012	August	22.9097
2012	September	23.3
2012	October	23.4097
2012	November	23.57
2012	December	23.5516
2013	January	24.1323
2013	February	23.8036
2013	March	23.6903
2013	April	23.8
2013	May	23.9484
2013	June	23.4833
2013	July	22.6548
2013	August	22.6774
2013	September	22.9467
2013	October	23.3
2013	November	23.2467
2013	December	23.3467
2014	January	23.1419
2014	February	23.6786
2014	March	23.3065
2014	April	23.1733
2014	May	30.4323
2014	June	23.8867
2014	July	23.42
2014	August	23.12
2014	September	23.1931
2014	October	23.5839
2014	November	23.6267
2014	December	23.3226
2015	January	23.6097
2015	February	23.4714
2015	March	23.2613
2015	April	23.7367
2015	May	24.1677
2015	June	23.74
2015	July	23.3548
2015	August	23.0548
2015	September	23.4133
2015	October	23.7903
2015	November	23.7
2015	December	23.9065
2016	January	24.0484
2016	February	23.7379
2016	March	24.0484
2016	April	24.03
2016	May	24.3581
2016	June	23.7133
2016	July	23.729
2016	August	23.5219
2016	September	23.3667
2016	October	23.3645
2016	November	23.6267
2016	December	24.2161
2017	January	23.9
2017	February	23.6607
2017	March	23.4581
2017	April	23.6897
2017	May	23.8903
2017	June	23.7567
2017	July	23.4733
2017	August	23.3967
2017	September	23.6133
2017	October	23.6633
2017	November	23.7467
2017	December	23.6645
2018	January	23.2032
2018	February	23.3
2018	March	23.1645
2018	April	23.8033
2018	May	23.8387
2018	June	23.6567
2018	July	23.3871
2018	August	23.3
2018	September	22.91
2018	October	23.4452
2018	November	23.4933
2018	December	23.7
2019	January	24.0355
2019	February	23.8
2019	March	23.5
2019	April	24.1133
2019	May	24.2613
2019	June	24.0833
2019	July	23.2097
2019	August	22.8484
2019	September	23.0533
2019	October	23.6323
2019	November	23.8433
2019	December	24.3065
2020	January	24.3903
2020	February	24.4517
2020	March	24.2806
2020	April	24.2967
2020	May	24.2774
2020	June	24.0567
2020	July	23.4935
2020	August	23.7387
2020	September	23.6067
2020	October	23.6774
2020	November	24.0867
2020	December	24.1806

## Sheet: Precipitation
Year	Month	Precipitation
1991	January	3.83871
1991	February	2.32143
1991	March	11.8065
1991	April	8.4
1991	May	4.22581
1991	June	0.666667
1991	July	0.258065
1991	August	3.96774
1991	September	0.166667
1991	October	3.19355
1991	November	8.06667
1991	December	8.90323
1992	January	9.22581
1992	February	6.31034
1992	March	6.03226
1992	April	6.26667
1992	May	5.6129
1992	June	1
1992	July	3.80645
1992	August	3.67742
1992	September	7.66667
1992	October	10.8065
1992	November	6.86667
1992	December	12.7419
1993	January	7.83871
1993	February	4.32143
1993	March	11.5161
1993	April	7.36667
1993	May	8.74194
1993	June	5.3
1993	July	0.774194
1993	August	0.612903
1993	September	1.1
1993	October	6.35484
1993	November	6.66667
1993	December	6.41935
1994	January	2.77419
1994	February	6.17857
1994	March	7.45161
1994	April	9.56667
1994	May	4.6129
1994	June	9.56667
1994	July	0.935484
1994	August	0
1994	September	0.3
1994	October	2.96774
1994	November	16.2
1994	December	7.70968
1995	January	7.12903
1995	February	11.8571
1995	March	9.83871
1995	April	6.13333
1995	May	6.12903
1995	June	3.8
1995	July	3.19355
1995	August	2.64516
1995	September	3.86667
1995	October	8.32258
1995	November	9.7
1995	December	7.09677
1996	January	3.51613
1996	February	9.51724
1996	March	3.54839
1996	April	14.3333
1996	May	1.45161
1996	June	4.13333
1996	July	2.54839
1996	August	7.58065
1996	September	6.06667
1996	October	8.06452
1996	November	8.16667
1996	December	7.45161
1997	January	3.25806
1997	February	3.46429
1997	March	11.9032
1997	April	6.06667
1997	May	5.29032
1997	June	1.13333
1997	July	1.16129
1997	August	0.83871
1997	September	#REF!
1997	October	0.419355
1997	November	3.66667
1997	December	#REF!
1998	January	4.87097
1998	February	3.78571
1998	March	9.06452
1998	April	3.03333
1998	May	4.45161
1998	June	6.26667
1998	July	NA
1998	August	4.93548
1998	September	8.6
1998	October	11.871
1998	November	8.06667
1998	December	8.45161
1999	January	9.96774
1999	February	6.82143
1999	March	7.29032
1999	April	8.0265
1999	May	5.74194
1999	June	3.2
1999	July	5.7875
1999	August	1.41935
1999	September	3.53333
1999	October	8.16129
1999	November	10.4667
1999	December	5.87097
2000	January	5.54839
2000	February	7.17241
2000	March	9.3871
2000	April	6.93333
2000	May	4.67742
2000	June	8.50572
2000	July	9.90323
2000	August	2.19355
2000	September	2.96667
2000	October	7.22581
2000	November	7.73333
2000	December	7.6129
2001	January	5.48387
2001	February	6.10714
2001	March	6.45161
2001	April	8.4
2001	May	4.70968
2001	June	7.6
2001	July	1.83871
2001	August	7.67742
2001	September	2.6
2001	October	10.8387
2001	November	12.4
2001	December	13.0968
2002	January	5.90323
2002	February	2.92857
2002	March	6.6129
2002	April	4.8
2002	May	8.06452
2002	June	5.1
2002	July	8.54839
2002	August	1.03226
2002	September	1.9
2002	October	2.80645
2002	November	6.6
2002	December	9.06452
2003	January	7.41935
2003	February	11.0357
2003	March	5.6129
2003	April	7.33333
2003	May	2.48387
2003	June	0.0666667
2003	July	2.54839
2003	August	7.16129
2003	September	6.3
2003	October	9.16129
2003	November	4.6
2003	December	11.2258
2004	January	12.2258
2004	February	6.06897
2004	March	11.8387
2004	April	6.83333
2004	May	5.16129
2004	June	1.56667
2004	July	2.54839
2004	August	0.419355
2004	September	2.26667
2004	October	7
2004	November	8.26667
2004	December	8.41935
2005	January	2.51613
2005	February	4.14286
2005	March	8.54839
2005	April	3.3
2005	May	6.77419
2005	June	4.83333
2005	July	4.64516
2005	August	5.77419
2005	September	7.63333
2005	October	7.67742
2005	November	11.3333
2005	December	8.35484
2006	January	5.35484
2006	February	11.75
2006	March	8.83871
2006	April	8.63333
2006	May	6.06452
2006	June	4.8
2006	July	3.12903
2006	August	4.6129
2006	September	3.93333
2006	October	1.70968
2006	November	5.16667
2006	December	5.58065
2007	January	6.80645
2007	February	3.28571
2007	March	7.54839
2007	April	9.76667
2007	May	7.06452
2007	June	3.46667
2007	July	6.77419
2007	August	6.35484
2007	September	2.86667
2007	October	7.67742
2007	November	3.46667
2007	December	7.67742
2008	January	6.06452
2008	February	3.41379
2008	March	10.7097
2008	April	8.6
2008	May	2.64516
2008	June	0.933333
2008	July	2.22581
2008	August	7.96774
2008	September	3.56667
2008	October	6.58065
2008	November	10.1667
2008	December	10.4839
2009	January	3.87097
2009	February	12.25
2009	March	6.19355
2009	April	6
2009	May	3.96774
2009	June	3.93333
2009	July	1.90323
2009	August	5
2009	September	5.46667
2009	October	5.58065
2009	November	11.5333
2009	December	10.8387
2010	January	3.64516
2010	February	10.3571
2010	March	6.64516
2010	April	7.33333
2010	May	9.09677
2010	June	5.56667
2010	July	12.6129
2010	August	11.1935
2010	September	8.8
2010	October	11.9677
2010	November	11.1667
2010	December	7.41935
2011	January	10.0323
2011	February	6.25
2011	March	7.25806
2011	April	9
2011	May	3.93548
2011	June	2.83333
2011	July	4.64516
2011	August	0.935484
2011	September	1.2
2011	October	6.87097
2011	November	NA
2011	December	5.83871
2012	January	4.37097
2012	February	4.48966
2012	March	7.17419
2012	April	8.14667
2012	May	8.58387
2012	June	1.75667
2012	July	3.48387
2012	August	1.75806
2012	September	1.76
2012	October	8.93226
2012	November	4.99667
2012	December	7.26452
2013	January	4.84194
2013	February	6.30714
2013	March	10.5161
2013	April	4.17
2013	May	5.89677
2013	June	2.76667
2013	July	6.74516
2013	August	2.36774
2013	September	7.84667
2013	October	10.4935
2013	November	5.69
2013	December	14.4437
2014	January	2.96452
2014	February	0.935714
2014	March	3.25806
2014	April	11.27
2014	May	3.5129
2014	June	3.40333
2014	July	6.29355
2014	August	5.95806
2014	September	2.23333
2014	October	3.24516
2014	November	7.6
2014	December	8.19032
2015	January	5.1
2015	February	3.97857
2015	March	5.74516
2015	April	10.1167
2015	May	4.32903
2015	June	1.15333
2015	July	2.35806
2015	August	1.20645
2015	September	0
2015	October	1.16129
2015	November	11.5067
2015	December	9.64516
2016	January	3.34839
2016	February	7.14828
2016	March	2.26129
2016	April	7.78667
2016	May	2.59032
2016	June	2.53667
2016	July	4.1
2016	August	6.42903
2016	September	3.64667
2016	October	4.2
2016	November	6.98
2016	December	4.51613
2017	January	6.5
2017	February	9.1
2017	March	8.5
2017	April	9.8
2017	May	7.1
2017	June	10.4
2017	July	3.2
2017	August	3.6
2017	September	10.3
2017	October	12.1
2017	November	18.8
2017	December	10.9
2018	January	8.4
2018	February	10.5
2018	March	12.8
2018	April	NA
2018	May	13.8
2018	June	8.6
2018	July	6.3
2018	August	7.5
2018	September	13.9
2018	October	6.6
2018	November	15.6
2018	December	12.4
2019	January	9.2
2019	February	8.9
2019	March	8.1
2019	April	6.1
2019	May	3.1
2019	June	6.1
2019	July	1
2019	August	0.2
2019	September	2.2
2019	October	6.8
2019	November	5.1
2019	December	1.8
2020	January	6.9
2020	February	7.2
2020	March	11.6
2020	April	9.7
2020	May	9.9
2020	June	6.3
2020	July	13.2
2020	August	13.7
2020	September	9.6
2020	October	18.4
2020	November	13.2
2020	December	20.2

## Sheet: average temp max
Average maximum temperature
Year	1991	1991	1991	1991	1991	1991	1991	1991	1991	1991	1991	1991
	January	February	March	April	May	June	July	August	September	October	November	December
1991	30.5045	31.4071	31.569	32.2	31.5226	32.3633	32.3119	32.529	31.9367	31.8774	30.9167	30.229
1992	29.9871	31.1414	31.9323	33.0033	32.3484	32.5467	31.8516	31.8161	31.4413	31.6968	30.6133	29.9258
1993	29.6	31.0143	30.9258	32.2467	31.7097	32.1567	31.0839	32.6742	32.5667	32.1484	31.2467	30.9806
1994	30.0097	31.2964	30.4548	31.1733	31.9452	31.1733	32.2484	33.0355	32.2533	32.0484	31.8067	31.1613
1995	30.1871	30.2929	31.7161	32.3167	32.5935	32.8067	32.2935	32.2226	32.15	32.3645	31.7	31.21
1996	30.4581	29.6517	32.1	32.1067	32.7516	32.6633	32.2581	31.4452	32.1967	32.3419	32.3033	31.7387
1997	30.6129	32.5929	31.8516	32.4433	32.8645	33.0833	32.7161	33.5742	125.264	32.2871	32.77	40.9145
1998	32.5032	32.4964	33.4097	33.6333	33.8677	33.18	NA	32.0484	32.78	32.6581	32.18	31.0452
1999	31.8516	31.8516	31.8516	31.8516	31.8516	31.8516	31.8516	31.8516	31.8516	31.8516	31.8516	31.8516
2000	32.4433	32.4433	32.4433	32.4433	32.4433	32.4433	32.4433	32.4433	32.4433	32.4433	32.4433	32.4433
2001	32.8645	32.8645	32.8645	32.8645	32.8645	32.8645	32.8645	32.8645	32.8645	32.8645	32.8645	32.8645
2002	33.0833	33.0833	33.0833	33.0833	33.0833	33.0833	33.0833	33.0833	33.0833	33.0833	33.0833	33.0833
2003	32.7161	32.7161	32.7161	32.7161	32.7161	32.7161	32.7161	32.7161	32.7161	32.7161	32.7161	32.7161
2004	33.5742	33.5742	33.5742	33.5742	33.5742	33.5742	33.5742	33.5742	33.5742	33.5742	33.5742	33.5742
2005	125.264	125.264	125.264	125.264	125.264	125.264	125.264	125.264	125.264	125.264	125.264	125.264
2006	32.2871	32.2871	32.2871	32.2871	32.2871	32.2871	32.2871	32.2871	32.2871	32.2871	32.2871	32.2871
2007	32.77	32.77	32.77	32.77	32.77	32.77	32.77	32.77	32.77	32.77	32.77	32.77
2008	40.9145	40.9145	40.9145	40.9145	40.9145	40.9145	40.9145	40.9145	40.9145	40.9145	40.9145	40.9145
2009	30.1839	30.8357	31.9548	32.5167	32.5267	32.7167	32.1548	32.0774	32.8033	32.6194	31.7767	30.4387
2010	31.1	31.3786	31.7129	32.72	32.9516	31.96	31.2645	31.9774	32.0533	31.8032	31.4833	31.1323
2011	30.1042	31.4429	31.4935	31.4733	32.6613	32.34	31.9097	32.7032	33.0533	31.7032	NA	30.1806
2012	31.8935	31.6276	31.9935	32.0333	32.4048	32.52	31.6677	32.4484	32.7167	32.5226	31.9867	31.2774
2013	31.6226	31.3607	32.171	32.53	32.2097	32.96	31.0516	31.771	31.7833	31.9742	31.9733	30.8375
2014	29.5903	31.6054	32.3581	32.44	32.4323	32.3367	32.0677	31.2516	32.2933	32.3065	32.0333	31.0935
2015	30.6129	30.8393	31.7484	32.15	32.3	32.6433	32.9323	32.4419	32.5167	32.2806	32.51	31.2613
2016	31.7645	31.1069	32.0548	33.0267	32.8194	32.1067	32.8129	32.7774	32.48	32.1516	31.5567	31.8387
2017	31.5	30.7607	31.6871	32.0931	32.1839	32.15	31.48	31.85	32.4333	32.1733	31.66	31.371
2018	31.5194	30.925	31.6226	31.9533	32.1968	32.2	32.2548	32.4677	32.0733	32.1968	32.0533	32.0774
2019	31.4935	31.1286	32.4774	32.5733	32.8581	32.0333	32.6419	33.5226	33.9233	32.3806	32.5167	30.771
2020	31.1806	31.9966	32.8839	32.48	32.0581	31.89	31.8	32.9387	31.8967	32.1065	32.26	31.8806

## Sheet: average temp min
Average minimum teperature
Year	January	February	March	April	May	June	July	August	September	October	November	December
1991	23.4032	23.1536	23.1032	23.5267	23.7452	23.6267	22.5452	23.0226	22.9433	22.7613	22.7733	22.4548
1992	22.6323	22.9586	23.4387	23.4767	23.5097	23.35	22.6461	22.6065	22.3067	22.729	22.63	22.629
1993	22.68	22.4357	22.5677	23.1367	23.0903	23.1867	22.5323	22.4839	22.07	22.5968	22.7533	22.6484
1994	22.8355	22.8107	22.4774	22.82	23.1032	22.82	21.9	21.9161	22.77	22.5452	22.8	22.8516
1995	22.9067	22.7143	23.0935	23.2567	23.6581	23.3267	22.8387	22.9484	22.7167	22.8871	23.34	22.9774
1996	22.6032	23.0069	22.8516	23.1367	23.5484	23.2367	22.9581	21.8469	23.1267	23.1161	22.99	22.9161
1997	23.8419	22.6857	22.9194	22.91	23.2581	22.64	22.2452	22.7935	23.0268	23.1323	23.25	22.973
1998	23.8419	23.8643	23.7645	24.2133	24.4581	23.5333	NA	23.1581	23.15	23.4129	23.21	23.0484
1999	23.2516	23.0393	23	23.097	23.1194	22.7233	22.2323	22.2871	22.5567	22.8161	22.8533	22.771
2000	22.6129	22.6	22.6806	22.8367	23.3	22.731	22.5774	22.2968	22.4	22.7194	23.2267	23.0839
2001	22.7742	22.2821	22.0733	23.2167	23.3968	22.8867	22.5452	22.8742	22.6867	22.6968	22.8867	22.9677
2002	23.2516	22.9143	23.0548	22.97	23.7323	23.0133	23.0097	22.5871	22.7867	22.6452	22.62	23.2161
2003	23.0613	23.025	23.0548	23.1833	23.5742	22.52	22.0742	22.7767	22.75	22.729	22.5833	22.6806
2004	22.3129	22.6724	22.4097	22.7033	23.0871	22.4767	22.0742	22.0742	22.5433	22.629	22.8367	23
2005	22.7452	22.6321	23.0097	23.0133	23.2839	22.91	22.8774	22.0581	22.69	22.7419	22.8	22.8677
2006	22.7	22.6929	22.9129	22.8033	23.229	22.9833	22.8935	22.4484	22.7767	23.1645	22.7533	23.371
2007	23.0613	22.8571	23.1613	23.0867	23.6323	23.7767	22.9194	22.6032	22.8633	23.0032	23.4367	22.8194
2008	23.4226	23.231	22.7452	22.97	23.2	23.25	22.771	22.6258	22.9533	23.1806	23.5767	23.6258
2009	23.4452	22.9143	22.9935	23.8367	23.9226	23.37	22.99	22.9194	23.4	23.4419	23.5633	23.7581
2010	23.6968	24.1	23.7452	24.2067	24.5548	24.0567	23.5065	23.4548	23.3333	23.5065	23.43	23.5452
2011	23.0871	23.4786	23.2	22.9267	24.0097	23.8533	23.0968	23.4032	23.5033	23.2233	NA	23.3097
2012	23.6839	23.2345	22.9323	23.21	23.1758	23.3233	23.0323	22.9097	23.3	23.4097	23.57	23.5516
2013	24.1323	23.8036	23.6903	23.8	23.9484	23.4833	22.6548	22.6774	22.9467	23.3	23.2467	23.3467
2014	23.1419	23.6786	23.3065	23.1733	30.4323	23.8867	23.42	23.12	23.1931	23.5839	23.6267	23.3226
2015	23.6097	23.4714	23.2613	23.7367	24.1677	23.74	23.3548	23.0548	23.4133	23.7903	23.7	23.9065
2016	24.0484	23.7379	24.0484	24.03	24.3581	23.7133	23.729	23.5219	23.3667	23.3645	23.6267	24.2161
2017	23.9	23.6607	23.4581	23.6897	23.8903	23.7567	23.4733	23.3967	23.6133	23.6633	23.7467	23.6645
2018	23.2032	23.3	23.1645	23.8033	23.8387	23.6567	23.3871	23.3	22.91	23.4452	23.4933	23.7
2019	24.0355	23.8	23.5	24.1133	24.2613	24.0833	23.2097	22.8484	23.0533	23.6323	23.8433	24.3065
2020	24.3903	24.4517	24.2806	24.2967	24.2774	24.0567	23.4935	23.7387	23.6067	23.6774	24.0867	24.1806
Mean_min	23.2771	23.1736	23.13	23.3727	23.8921	23.3324	22.8616	22.7917	22.9586	23.1182	23.2156	23.257

## Sheet: average precp
Average precipitation
Year	January	February	March	April	May	June	July	August	September	October	November	December
1991	3.83871	2.32143	11.8065	8.4	4.22581	0.666667	0.258065	3.96774	0.166667	3.19355	8.06667	8.90323
1992	9.22581	6.31034	6.03226	6.26667	5.6129	1	3.80645	3.67742	7.66667	10.8065	6.86667	12.7419
1993	7.83871	4.32143	11.5161	7.36667	8.74194	5.3	0.774194	0.612903	1.1	6.35484	6.66667	6.41935
1994	2.77419	6.17857	7.45161	9.56667	4.6129	9.56667	0.935484	0	0.3	2.96774	16.2	7.70968
1995	7.12903	11.8571	9.83871	6.13333	6.12903	3.8	3.19355	2.64516	3.86667	8.32258	9.7	7.09677
1996	3.51613	9.51724	3.54839	14.3333	1.45161	4.13333	2.54839	7.58065	6.06667	8.06452	8.16667	7.45161
1997	3.25806	3.46429	11.9032	6.06667	5.29032	1.13333	1.16129	0.83871	5.45802	0.419355	3.66667	3.87818
1998	4.87097	3.78571	9.06452	3.03333	4.45161	6.26667	NA	4.93548	8.6	11.871	8.06667	8.45161
1999	9.96774	6.82143	7.29032	8.0265	5.74194	3.2	5.7875	1.41935	3.53333	8.16129	10.4667	5.87097
2000	5.54839	7.17241	9.3871	6.93333	4.67742	8.50572	9.90323	2.19355	2.96667	7.22581	7.73333	7.6129
2001	5.48387	6.10714	6.45161	8.4	4.70968	7.6	1.83871	7.67742	2.6	10.8387	12.4	13.0968
2002	5.90323	2.92857	6.6129	4.8	8.06452	5.1	8.54839	1.03226	1.9	2.80645	6.6	9.06452
2003	7.41935	11.0357	5.6129	7.33333	2.48387	0.0666667	2.54839	7.16129	6.3	9.16129	4.6	11.2258
2004	12.2258	6.06897	11.8387	6.83333	5.16129	1.56667	2.54839	0.419355	2.26667	7	8.26667	8.41935
2005	2.51613	4.14286	8.54839	3.3	6.77419	4.83333	4.64516	5.77419	7.63333	7.67742	11.3333	8.35484
2006	5.35484	11.75	8.83871	8.63333	6.06452	4.8	3.12903	4.6129	3.93333	1.70968	5.16667	5.58065
2007	6.80645	3.28571	7.54839	9.76667	7.06452	3.46667	6.77419	6.35484	2.86667	7.67742	3.46667	7.67742
2008	6.06452	3.41379	10.7097	8.6	2.64516	0.933333	2.22581	7.96774	3.56667	6.58065	10.1667	10.4839
2009	3.87097	12.25	6.19355	6	3.96774	3.93333	1.90323	5	5.46667	5.58065	11.5333	10.8387
2010	3.64516	10.3571	6.64516	7.33333	9.09677	5.56667	12.6129	11.1935	8.8	11.9677	11.1667	7.41935
2011	10.0323	6.25	7.25806	9	3.93548	2.83333	4.64516	0.935484	1.2	6.87097	NA	5.83871
2012	4.37097	4.48966	7.17419	8.14667	8.58387	1.75667	3.48387	1.75806	1.76	8.93226	4.99667	7.26452
2013	4.84194	6.30714	10.5161	4.17	5.89677	2.76667	6.74516	2.36774	7.84667	10.4935	5.69	14.4437
2014	2.96452	0.935714	3.25806	11.27	3.5129	3.40333	6.29355	5.95806	2.23333	3.24516	7.6	8.19032
2015	5.1	3.97857	5.74516	10.1167	4.32903	1.15333	2.35806	1.20645	0	1.16129	11.5067	9.64516
2016	3.34839	7.14828	2.26129	7.78667	2.59032	2.53667	4.1	6.42903	3.64667	4.2	6.98	4.51613
2017	6.5	9.1	8.5	9.8	7.1	10.4	3.2	3.6	10.3	12.1	18.8	10.9
2018	8.4	10.5	12.8	NA	13.8	8.6	6.3	7.5	13.9	6.6	15.6	12.4
2019	9.2	8.9	8.1	6.1	3.1	6.1	1	0.2	2.2	6.8	5.1	1.8
2020	6.9	7.2	11.6	9.7	9.9	6.3	13.2	13.7	9.6	18.4	13.2	20.2
Mean_prec	5.96387	6.59664	8.13505	7.69712	5.6572	4.24297	4.36097	4.29065	4.59149	7.23968	8.9577	8.7832

## Sheet: all analysis
	January	February	March	April	May	June	July	August	September	October	November	December
Mean_maximum temperature	30.7349	31.2552	31.8683	32.2418	32.4291	32.3041	31.9922	32.2895	35.4231	32.1526	31.8186	31.3613
Mean_minimum temperature	23.2771	23.1736	23.13	23.3727	23.8921	23.3324	22.8616	22.7917	22.9586	23.1182	23.2156	23.257
Mean_precipitation	5.96387	6.59664	8.13505	7.69712	5.6572	4.24297	4.36097	4.29065	4.59149	7.23968	8.9577	8.7832
Month	Mean maximum temperature	Mean minimum temperature	Mean precipitation
January	30.7349	23.2771	5.96387
February	31.2552	23.1736	6.59664
March	31.8683	23.13	8.13505
April	32.2418	23.3727	7.69712
May	32.4291	23.8921	5.6572
June	32.3041	23.3324	4.24297
July	31.9922	22.8616	4.36097
August	32.2895	22.7917	4.29065
September	35.4231	22.9586	4.59149
October	32.1526	23.1182	7.23968
November	31.8186	23.2156	8.9577
December	31.3613	23.257	8.7832
Month	Mean maximum temperature	Mean minimum temperature	Mean precipitation
January	30.7349	23.2771	5.96387
February	31.2552	23.1736	6.59664
March	31.8683	23.13	8.13505
April	32.2418	23.3727	7.69712
May	32.4291	23.8921	5.6572
June	32.3041	23.3324	4.24297
July	31.9922	22.8616	4.36097
August	32.2895	22.7917	4.29065
September	35.4231	22.9586	4.59149
October	32.1526	23.1182	7.23968
November	31.8186	23.2156	8.9577
December	31.3613	23.257	8.7832
Month	Mean maximum temperature	Mean minimum temperature	Mean precipitation
January	31.5	23.9	6.5
February	30.7607	23.6607	9.1
March	31.6871	23.4581	8.5
April	32.0931	23.6897	9.8
May	32.1839	23.8903	7.1
June	32.15	23.7567	10.4
July	31.48	23.4733	3.2
August	31.85	23.3967	3.6
September	32.4333	23.6133	10.3
October	32.1733	23.6633	12.1
November	31.66	23.7467	18.8
December	31.371	23.6645	10.9

## Sheet: accumulated precipitation
	January	February	March		April	May	June	July	August	September	October	November	December
Mean_max	30.7349	31.2552	31.8683		32.2418	32.4291	32.3041	31.9922	32.2895	35.4231	32.1526	31.8186	31.3613
Mean_min	23.2771	23.1736	23.13		23.3727	23.8921	23.3324	22.8616	22.7917	22.9586	23.1182	23.2156	23.257
Mean_prec	5.96387	6.59664	8.13505		7.69712	5.6572	4.24297	4.36097	4.29065	4.59149	7.23968	8.9577	8.7832
Month	Mean T max	Mean T min	Mean prec
January	30.7349	23.2771	5.96387
February	31.2552	23.1736	6.59664
March	31.8683	23.13	8.13505
April	32.2418	23.3727	7.69712
May	32.4291	23.8921	5.6572
June	32.3041	23.3324	4.24297
July	31.9922	22.8616	4.36097
August	32.2895	22.7917	4.29065
September	35.4231	22.9586	4.59149
October	32.1526	23.1182	7.23968
November	31.8186	23.2156	8.9577
December	31.3613	23.257	8.7832
Month	Mean Temperature Maximum	Mean Temperature Minimum	Mean Accumulated Precipitation
January	30.7349	23.2771	172.26
February	31.2552	23.1736	183.58
March	31.8683	23.13	238.68
April	32.2418	23.3727	224.5
May	32.4291	23.8921	164.34
June	32.3041	23.3324	110.64
July	31.9922	22.8616	116.37
August	32.2895	22.7917	115.24
September	35.4231	22.9586	117.81
October	32.1526	23.1182	206.77
November	31.8186	23.2156	244.19
December	31.3613	23.257	248.58
Month	Mean Temperature Maximum	Mean Temperature Minimum	Accumulated Precipitation
January	31.5	23.9	129
February	30.7607	23.6607	191
March	31.6871	23.4581	196
April	32.0931	23.6897	236.4
May	32.1839	23.8903	158
June	32.15	23.7567	146
July	31.48	23.4733	55
August	31.85	23.3967	68
September	32.4333	23.6133	216
October	32.1733	23.6633	230
November	31.66	23.7467	340
December	31.371	23.6645	273
